# Supplementary material for: Approach to Pyrido[2,1-b][1,3]benzothiazol-1-ones via In Situ Generation of Acyl(1,3-benzothiazol-2-yl)ketenes by Thermolysis of Pyrrolo[2,1-c][1,4]benzothiazine-1,2,4-triones
Source: MDPI journal article supplement (doi:10.3390/molecules28145495), 2023-07-18
Supplement: s1 [file s1]

## Supporting information

for

### **Approach to Pyrido[2,1-*b*][1,3]benzothiazol-1-ones via *in situ* Generation of Acyl(1,3-benzothiazol-2-yl)ketenes by Thermolysis of Pyrrolo[2,1-*c*][1,4]benzothiazine-1,2,4-triones**

Ekaterina A. Lystsova <sup>1</sup>, Alexander S. Novikov <sup>2,3</sup>, Maksim V. Dmitriev <sup>1</sup>, Andrey N. Maslivets <sup>1</sup> and Ekaterina E. Khramtsova <sup>1,\*</sup>

<sup>1</sup> Department of Organic Chemistry, Perm State University, ul. Bukireva, 15, 614990 Perm, Russia, caterina.stepanova@psu.ru

<sup>2</sup> Institute of Chemistry, Saint Petersburg State University, Universitetskaya nab. 7/9, 199034 St. Petersburg, Russia

<sup>3</sup> Research Institute of Chemistry, Peoples' Friendship University of Russia (RUDN University), Miklukho-Maklaya Street, 6, Moscow, 117198, Russia

\* Correspondence: caterina.stepanova@psu.ru

## Table of contents

|                                                                                                                                                                                                           |     |
|-----------------------------------------------------------------------------------------------------------------------------------------------------------------------------------------------------------|-----|
| NMR charts of compounds <b>2a-g</b> .....                                                                                                                                                                 | S3  |
| STA charts of compounds <b>1a-g, 4</b> .....                                                                                                                                                              | S18 |
| Calculated total electronic energies (E, in Hartree), enthalpies (H, in Hartree),<br>Gibbs free energies (G, in Hartree), and entropies (S, cal/mol•K) for<br>optimized equilibrium model structures..... | S26 |
| HPLC data for thermal decomposition of compounds <b>1a</b> and <b>4</b> .....                                                                                                                             | S27 |
| ORTEP images of X-ray crystal structures of compounds <b>2a, f</b> .....                                                                                                                                  | S30 |

MAN7050004.esp

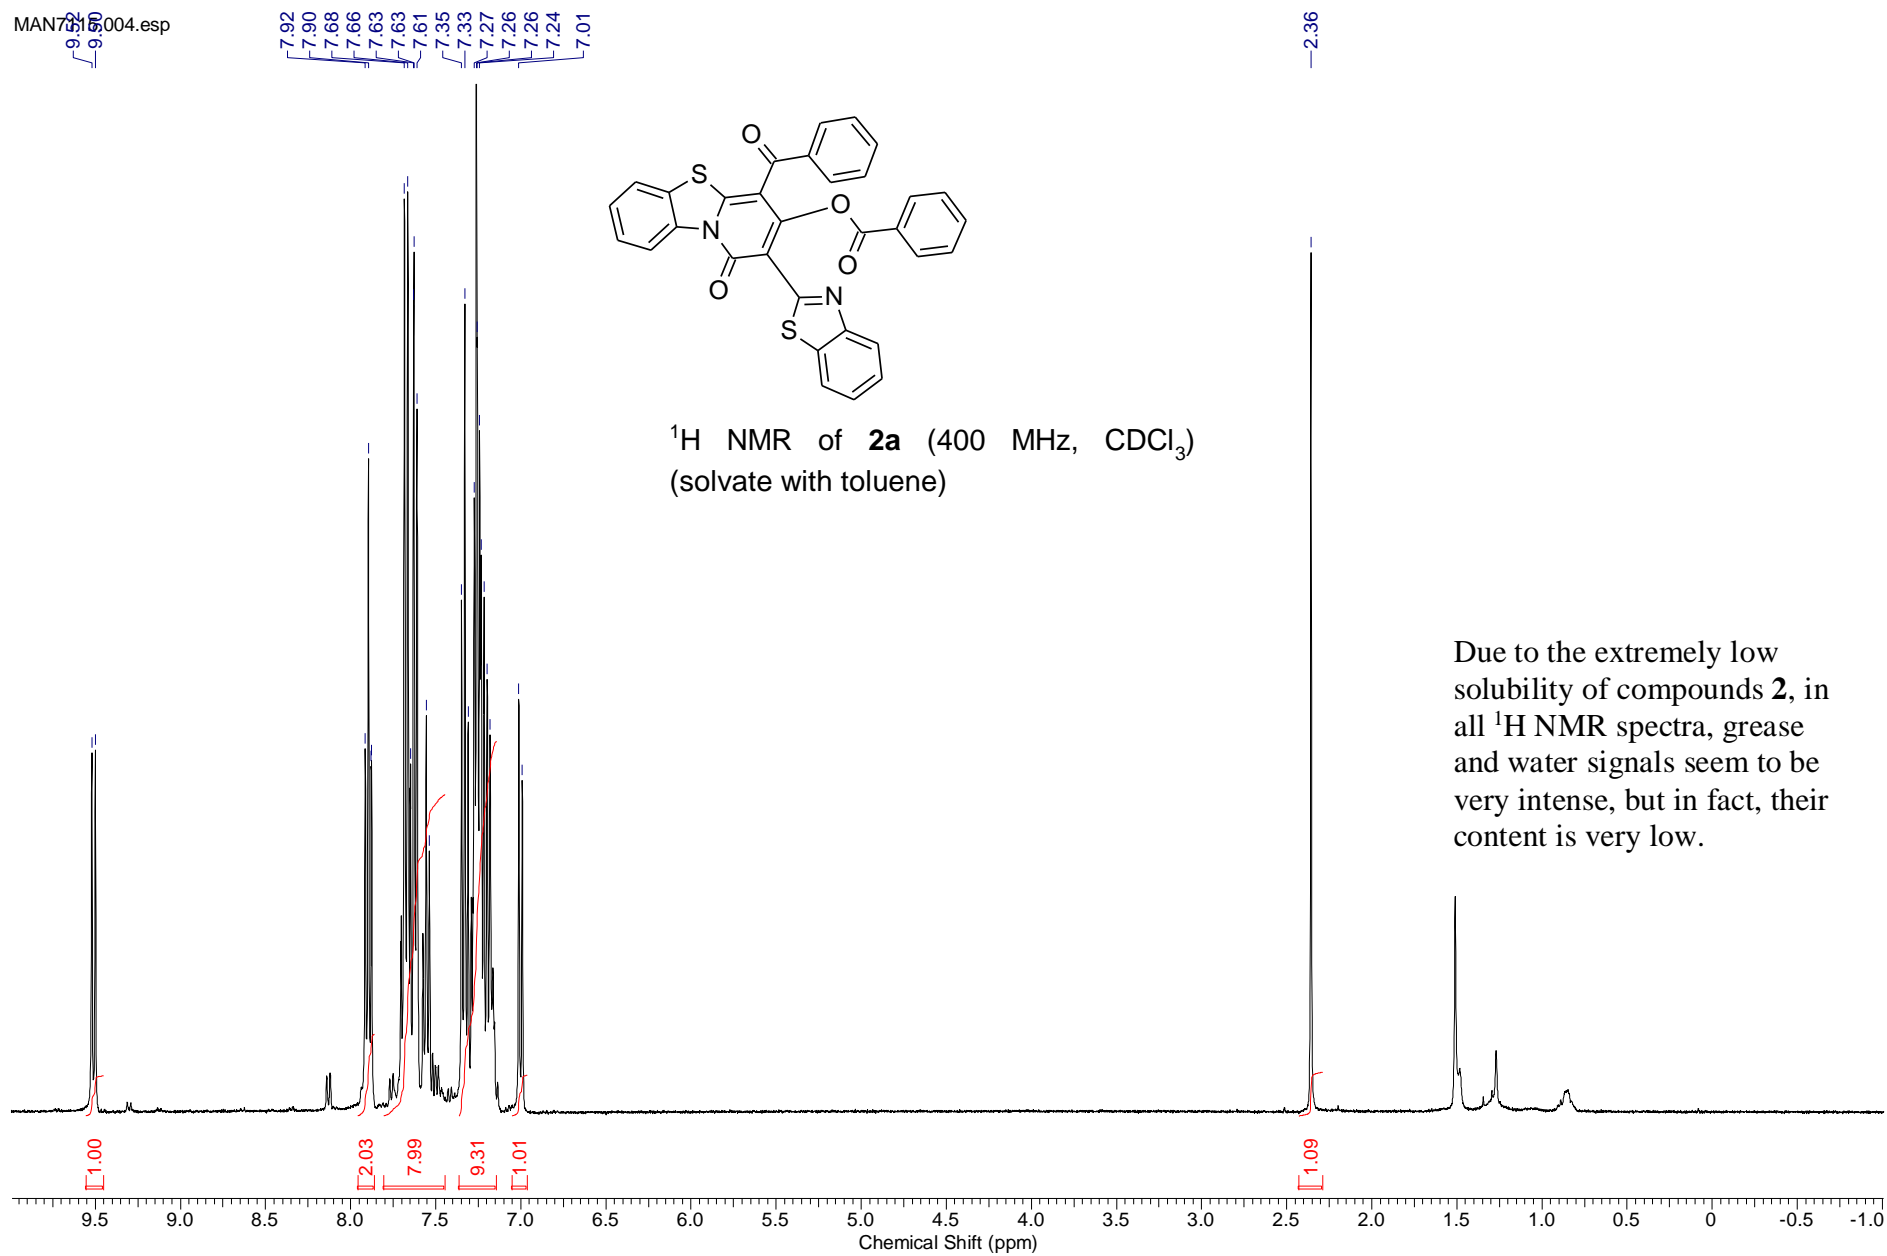

Due to the extremely low solubility of compounds **2**, in all <sup>1</sup>H NMR spectra, grease and water signals seem to be very intense, but in fact, their content is very low.

MAN7115.005.esp

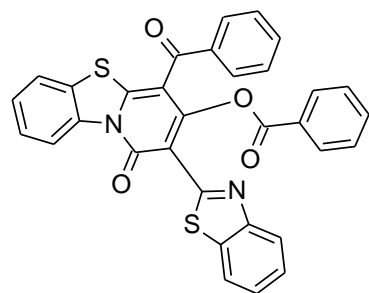

$^{13}\text{C}$  NMR of **2a** (100 MHz,  $\text{CDCl}_3$ )  
(solvate with toluene)

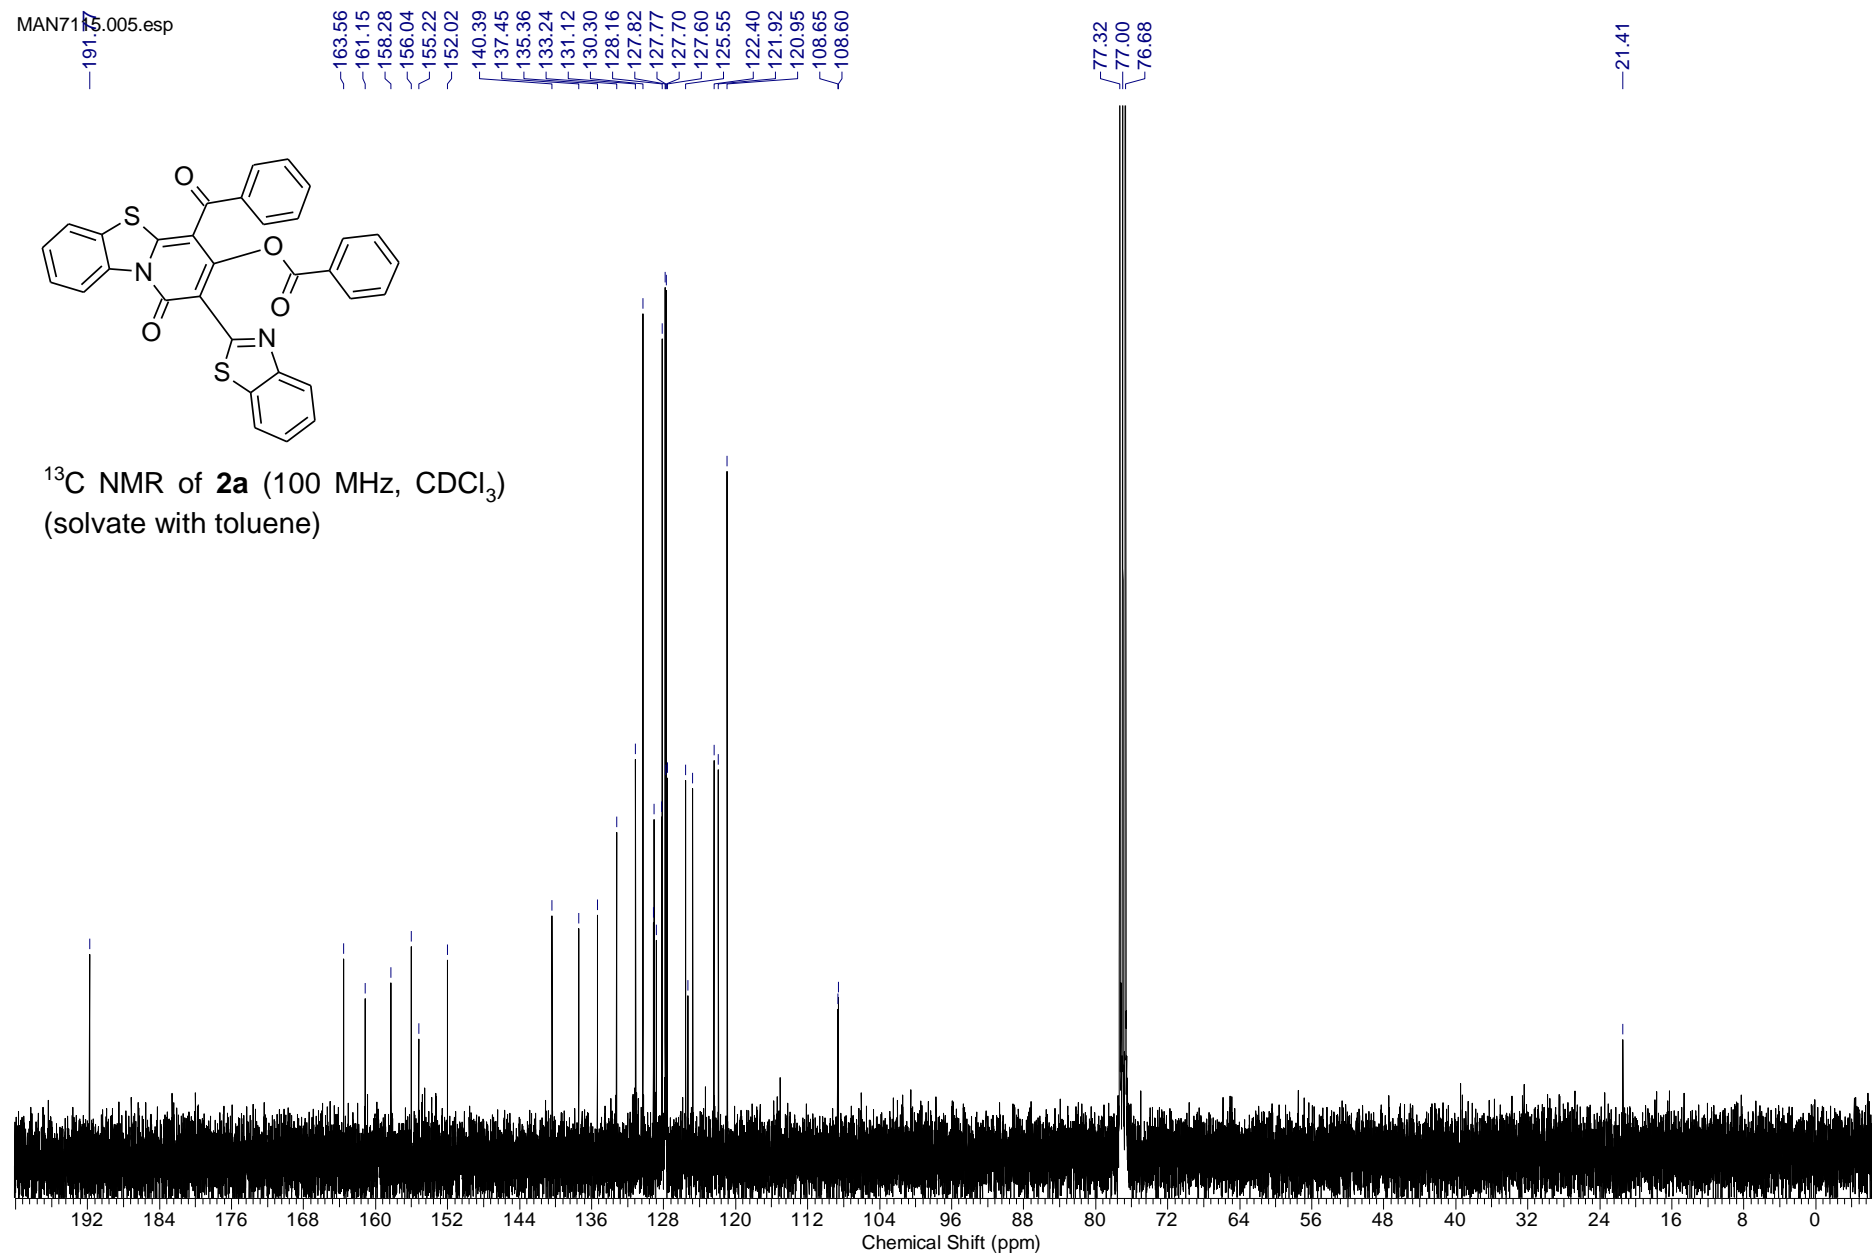

MAN71821.esp

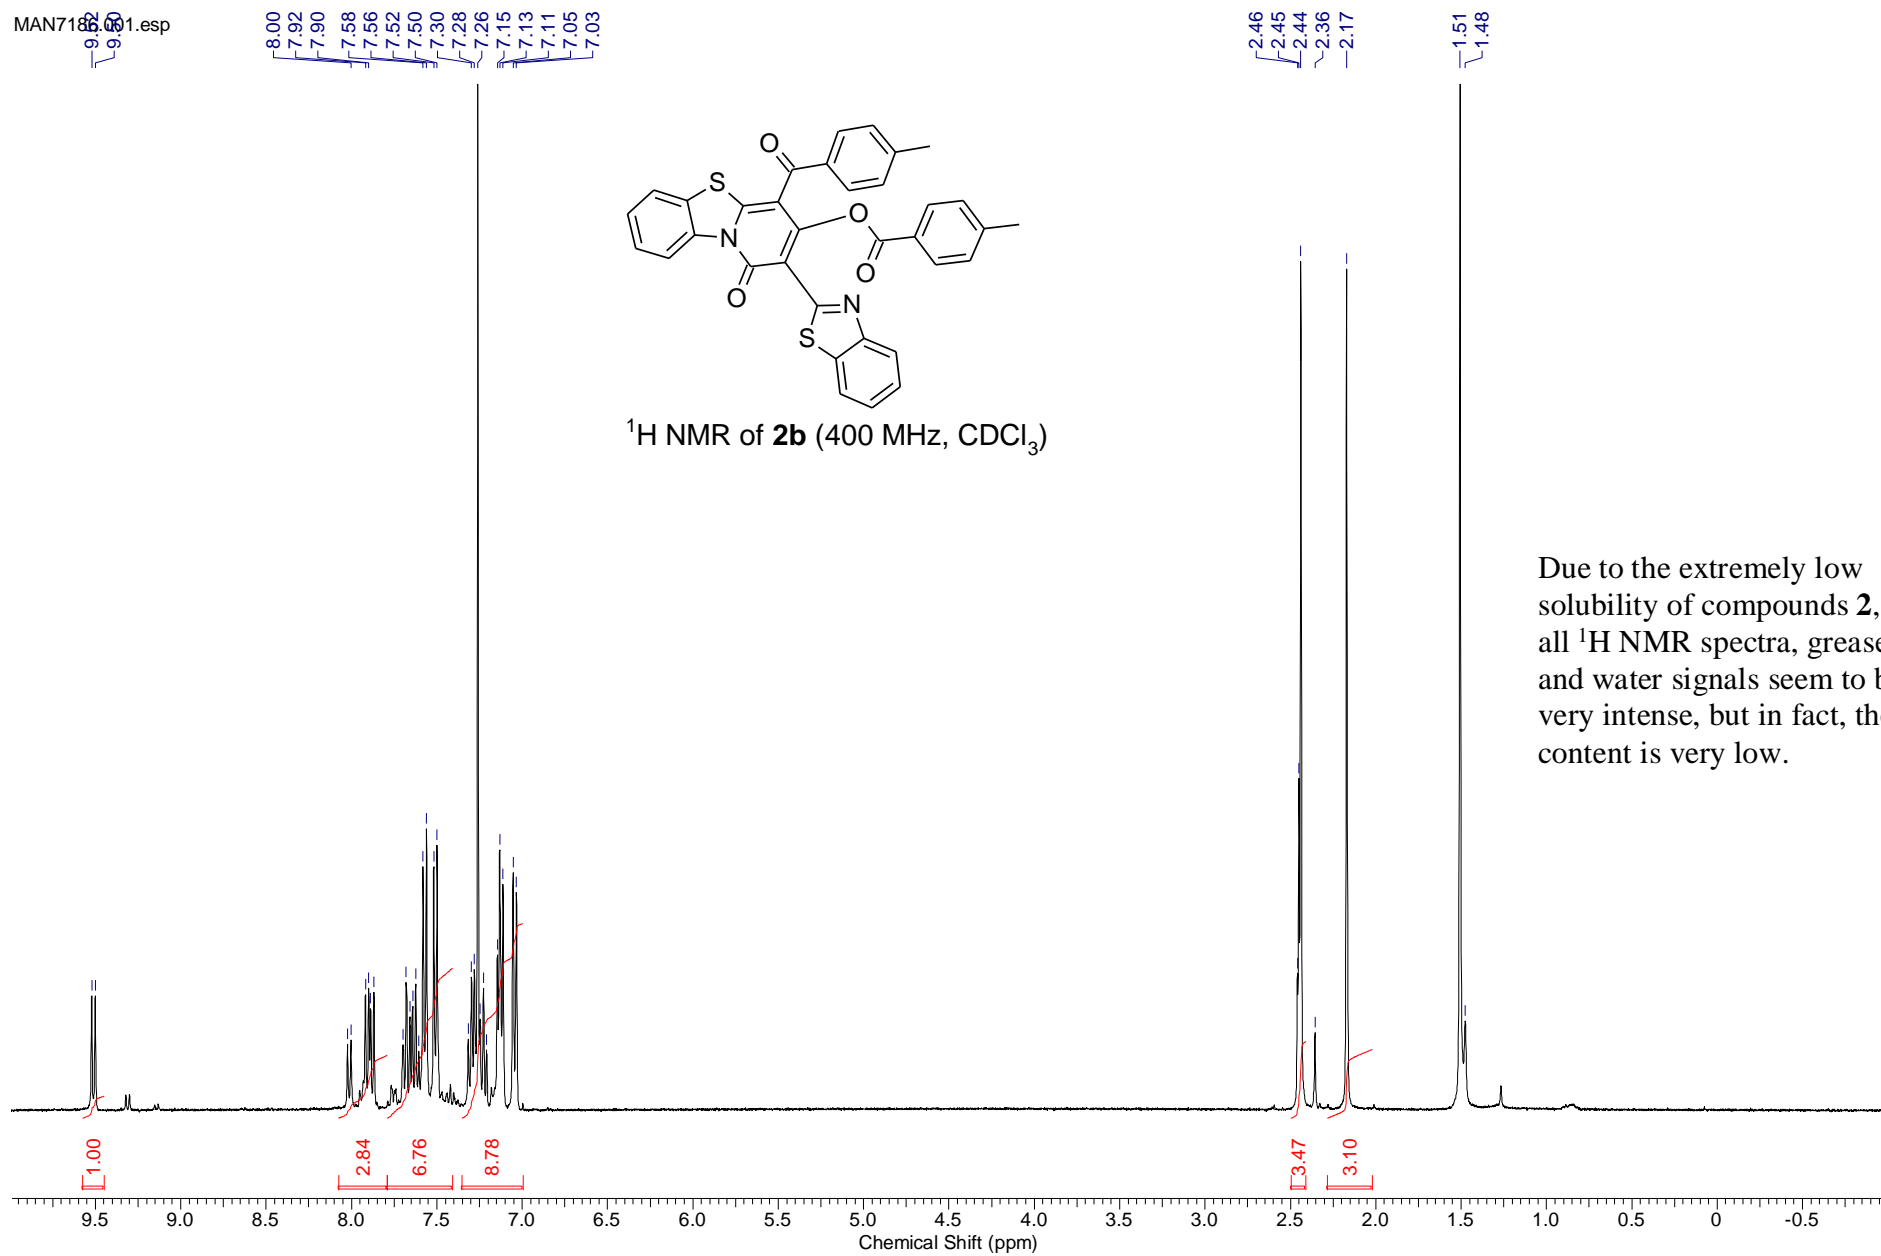

Due to the extremely low solubility of compounds **2**, in all <sup>1</sup>H NMR spectra, grease and water signals seem to be very intense, but in fact, their content is very low.

MAN7186c  
MAN7186c.cryo.esp

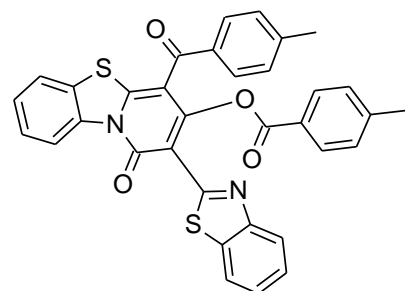

$^{13}\text{C}$  NMR of **2b** (125 MHz,  $\text{CDCl}_3$ )

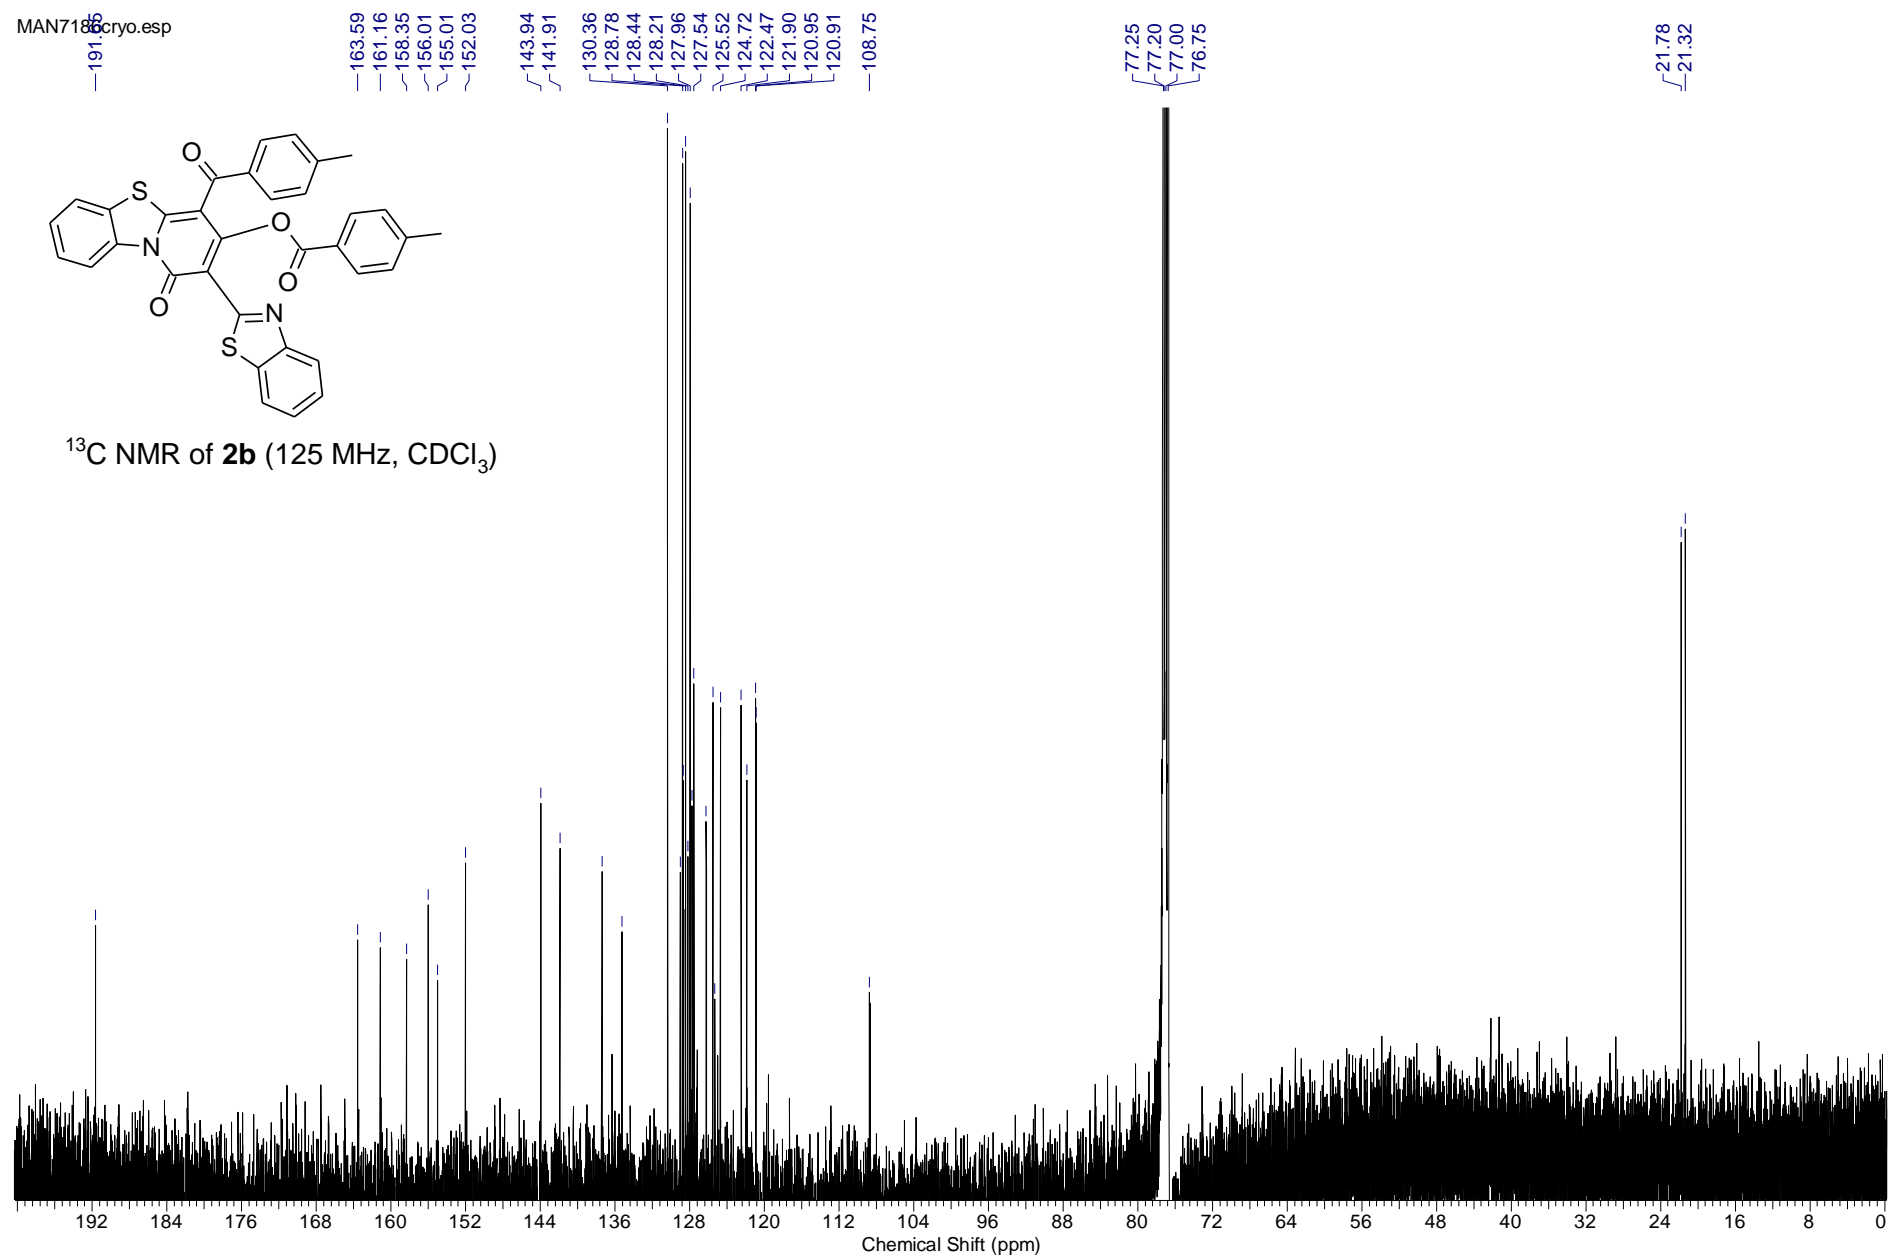



id29539153817\_MAN8267\_13C.002.es

191.63

161.84

159.51

153.68

150.13

138.26

136.46

132.80

129.52

126.19

122.50

118.61

110.49

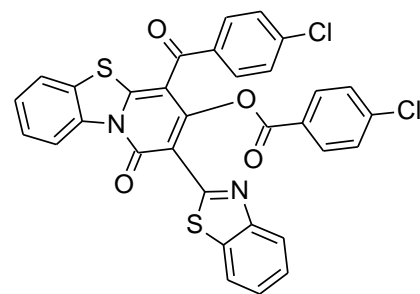

$^{13}\text{C}$  ssNMR of **2c** (100 MHz)

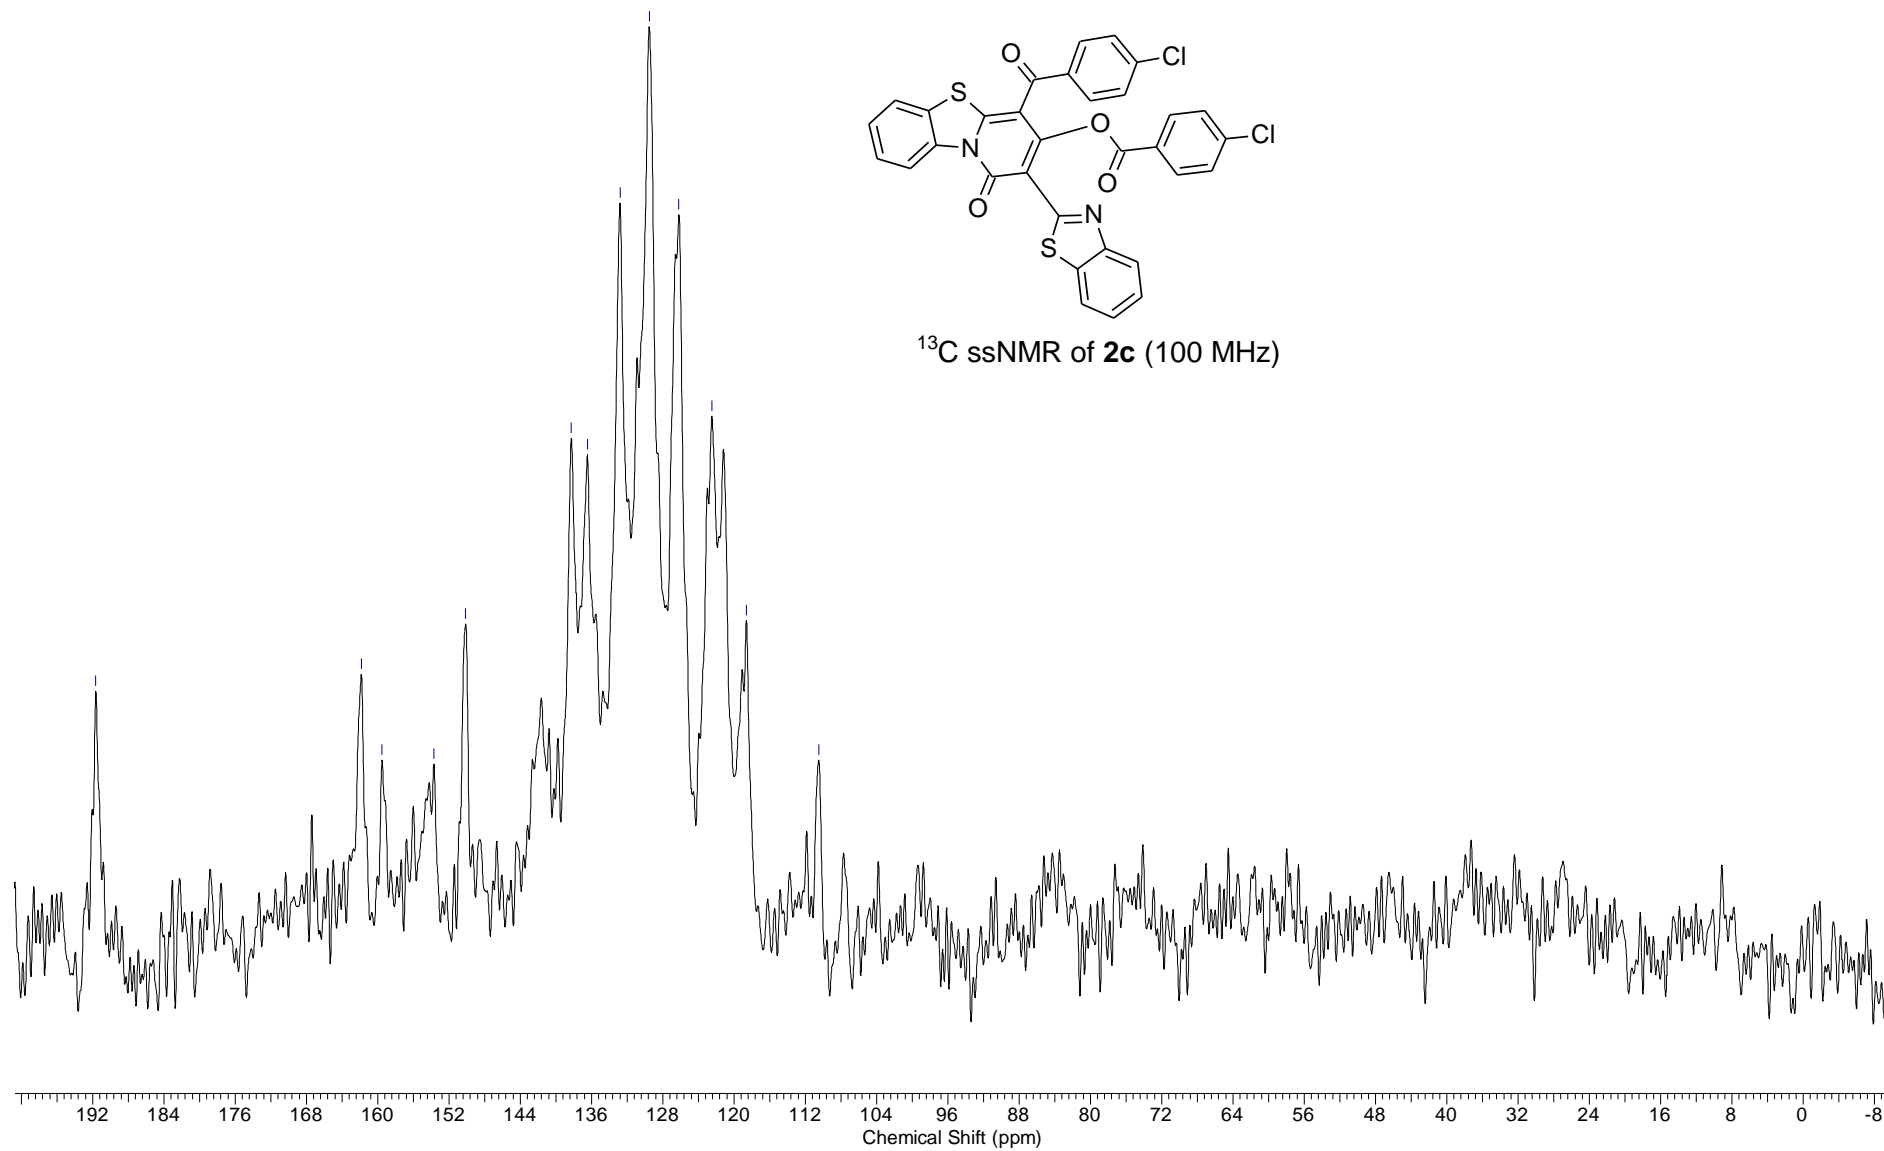

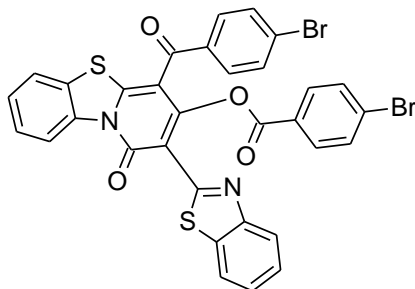<sup>1</sup>H NMR of **2d** (400 MHz, CDCl<sub>3</sub>)

Due to the extremely low solubility of compounds **2**, in all  $^1\text{H}$  NMR spectra, grease and water signals seem to be very intense, but in fact, their content is very low.

id29539\_53817\_MAN8266\_13C.002.6p

191.62

162.67

159.51

154.41

150.20

138.69

136.61

132.76

129.69

126.32

122.80

121.04

118.70

110.54

107.20

99.72

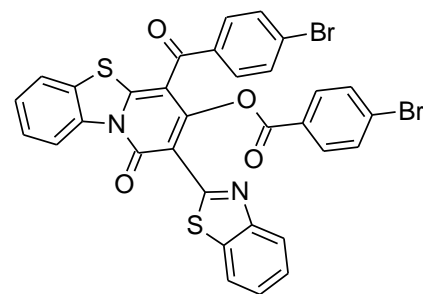

$^{13}\text{C}$  ssNMR of **2d** (100 MHz)

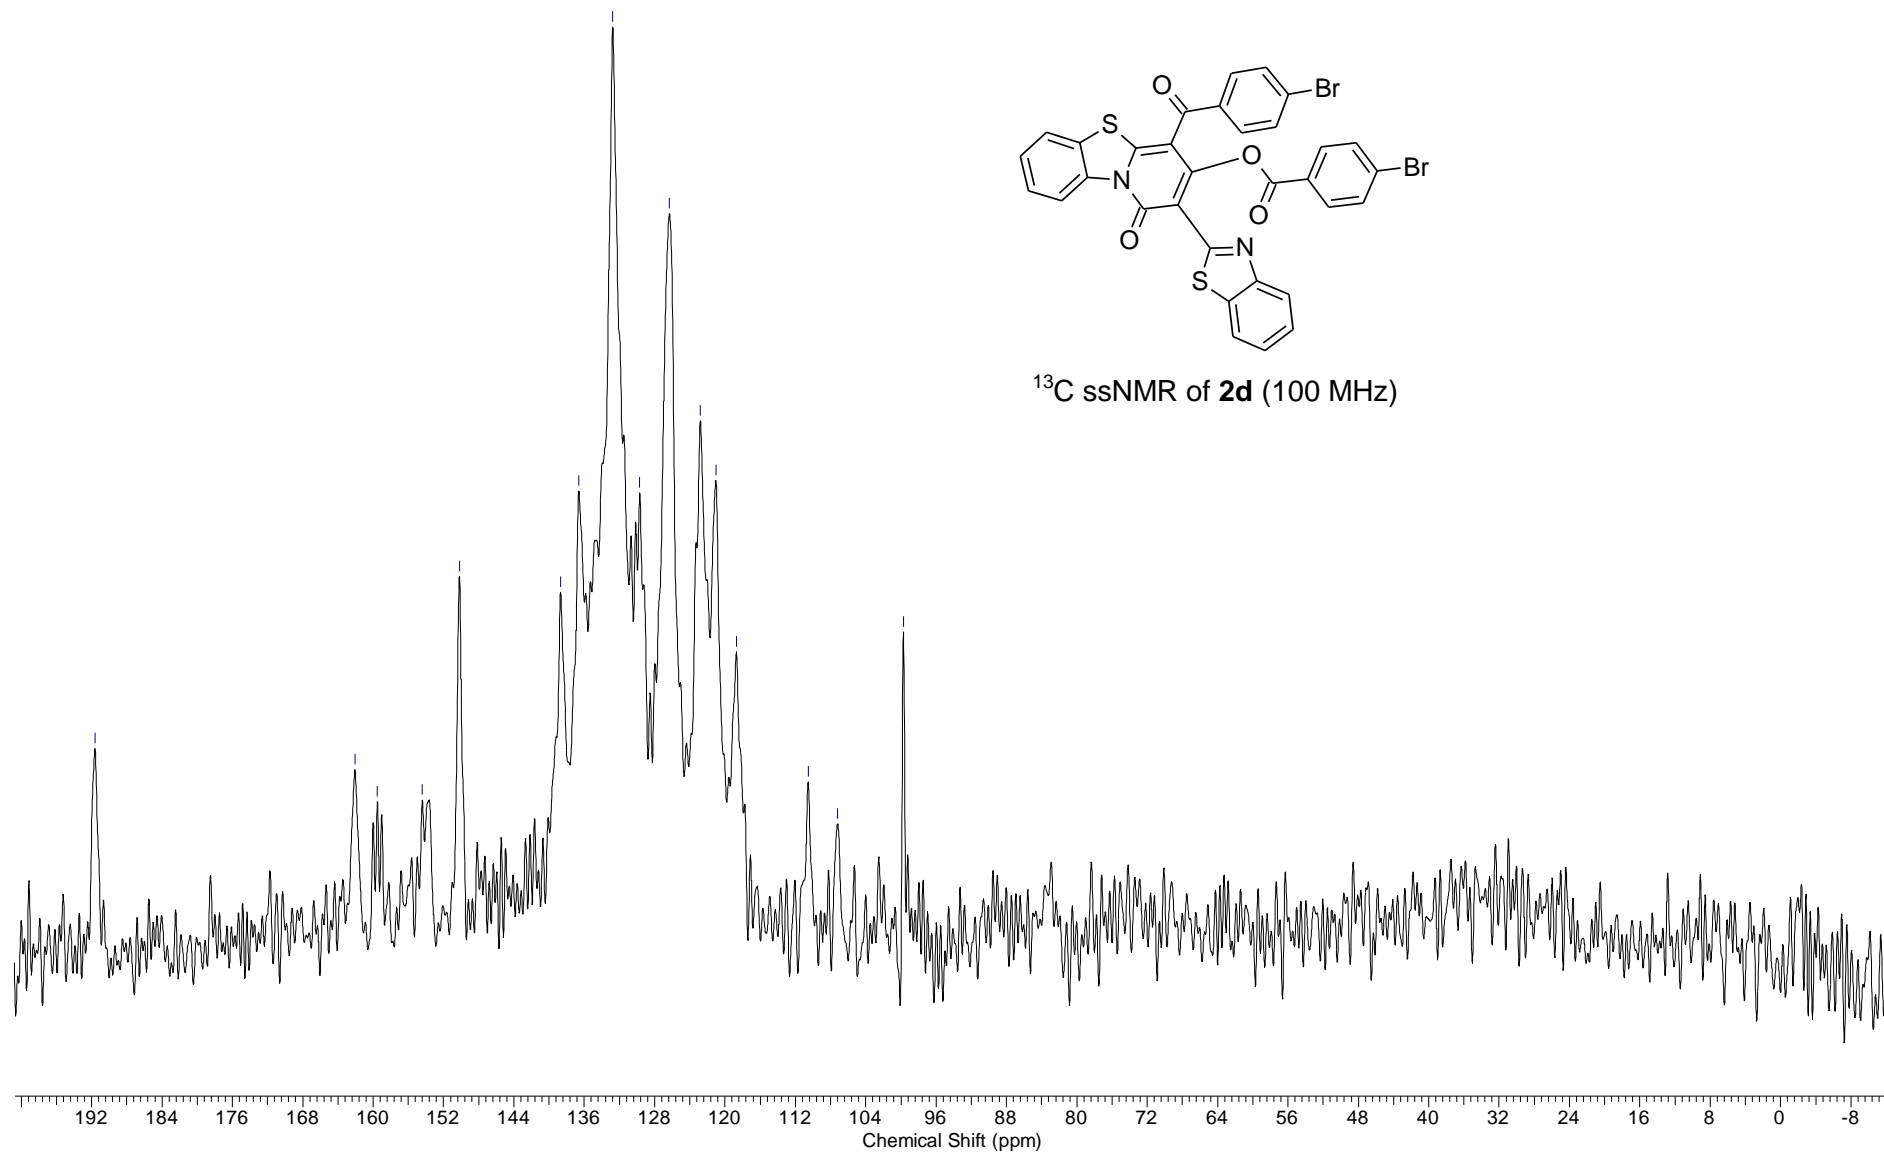

MAN8268003.esp

9.38  
9.34

8.31  
8.29  
8.10  
7.76  
7.74  
7.73  
7.72  
7.71  
7.36  
7.34  
7.32  
7.30  
7.17  
7.15  
7.13  
6.97

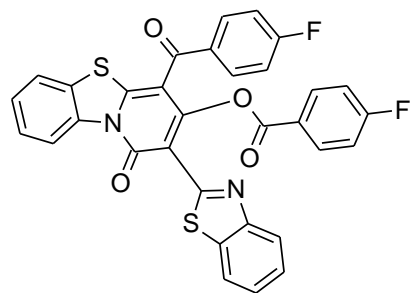

$^1\text{H}$  NMR of **2e** (400 MHz,  $\text{DMSO}-d_6$ )

3.25

2.50  
2.50  
2.50

Due to the extremely low solubility of compounds **2**, in all  $^1\text{H}$  NMR spectra, grease and water signals seem to be very intense, but in fact, their content is very low.

0.99

1.09

0.95

5.33

1.29

3.89

1.92

0.90

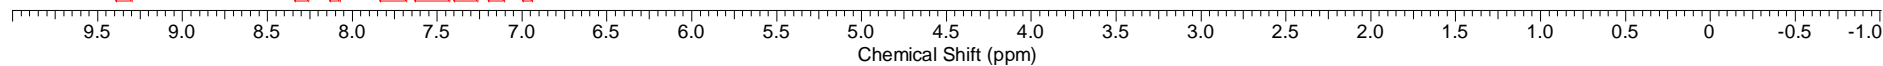

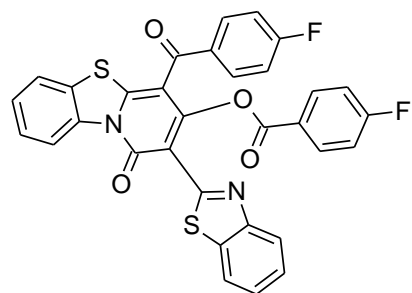

$^{19}\text{F}$  NMR of **2e** (376 MHz,  $\text{DMSO}-d_6$ )

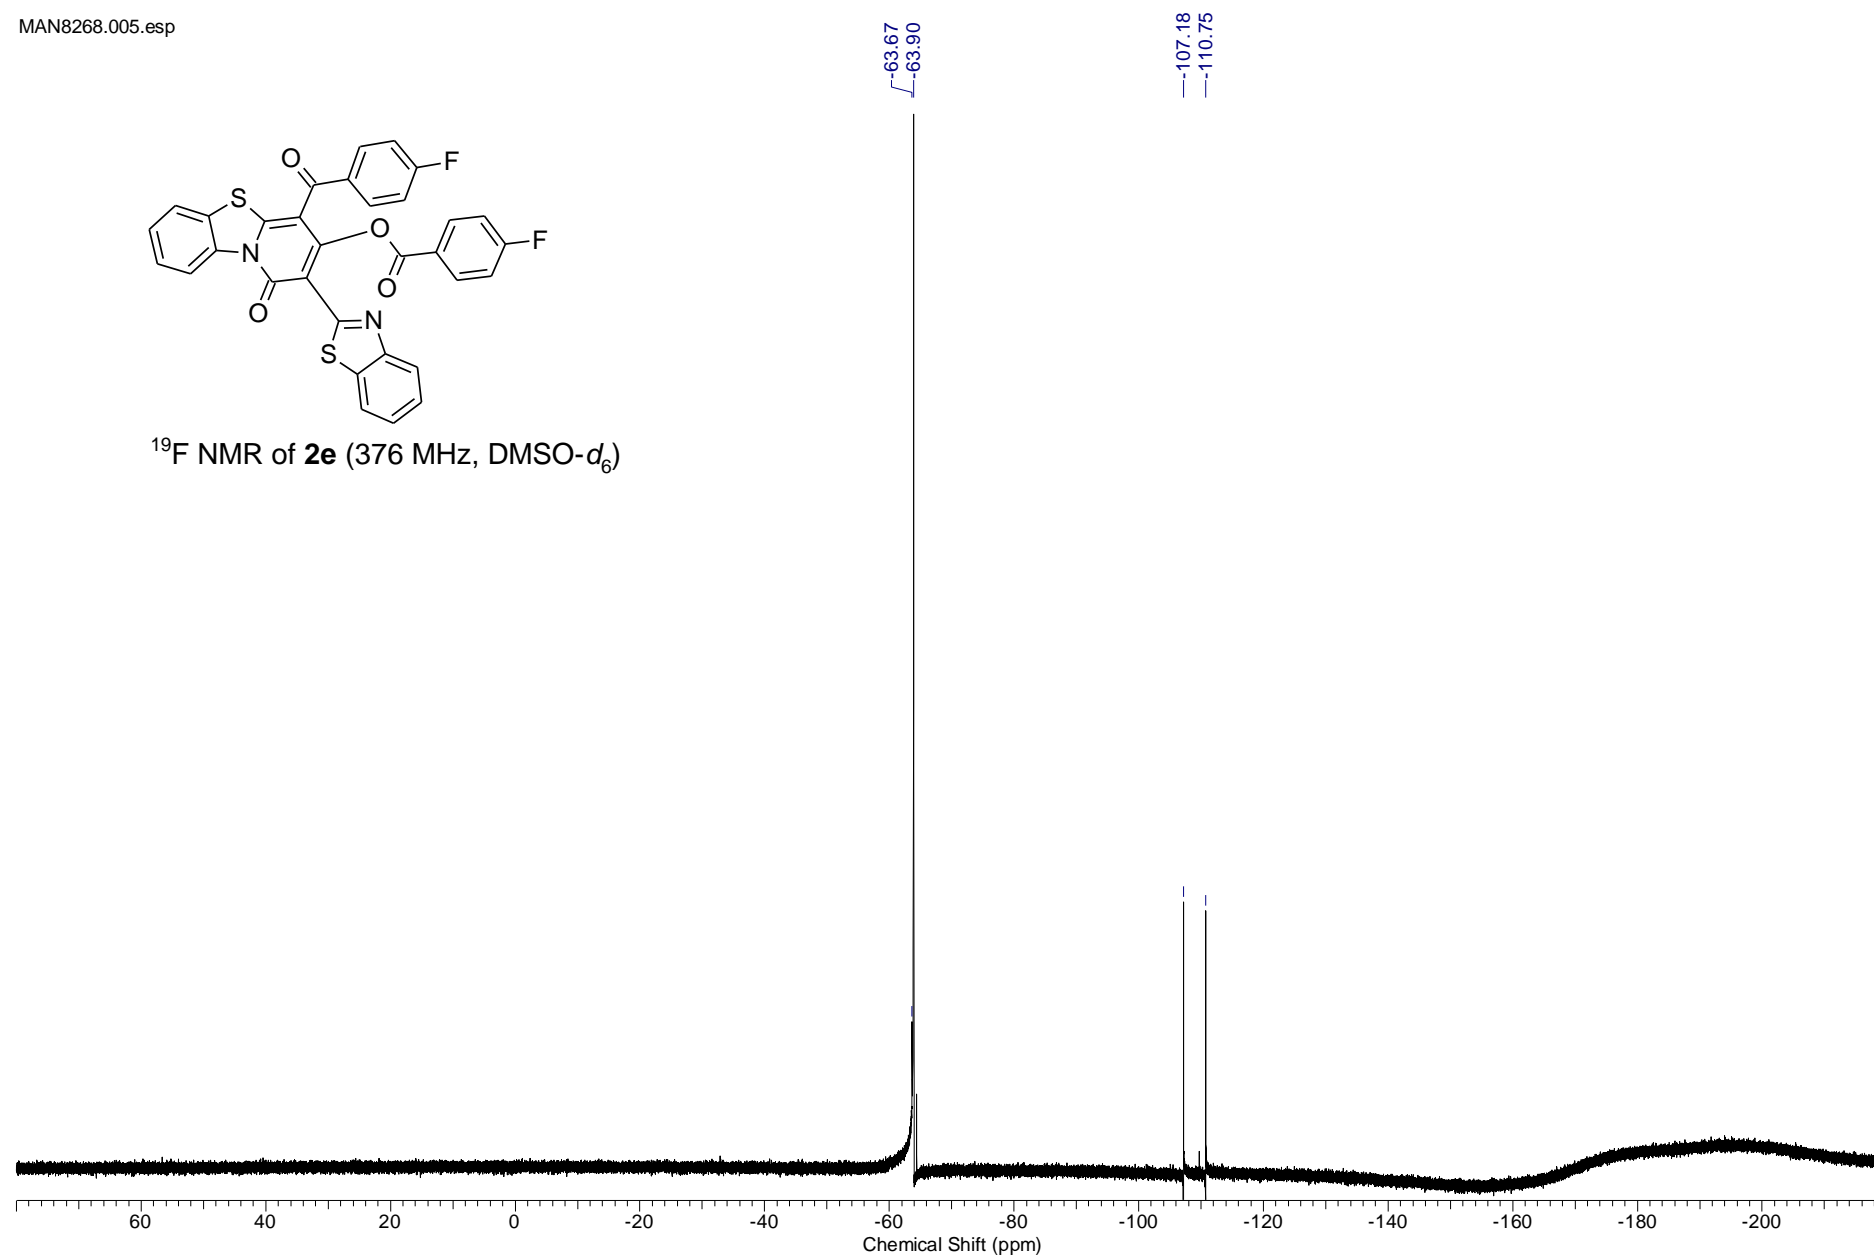

MAN826800.00  
MAN826800.00

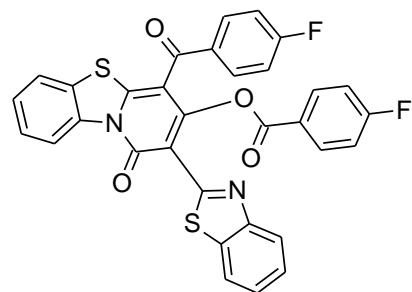

$^{13}\text{C}$  NMR of **2e** (125 MHz,  $\text{CDCl}_3$ )

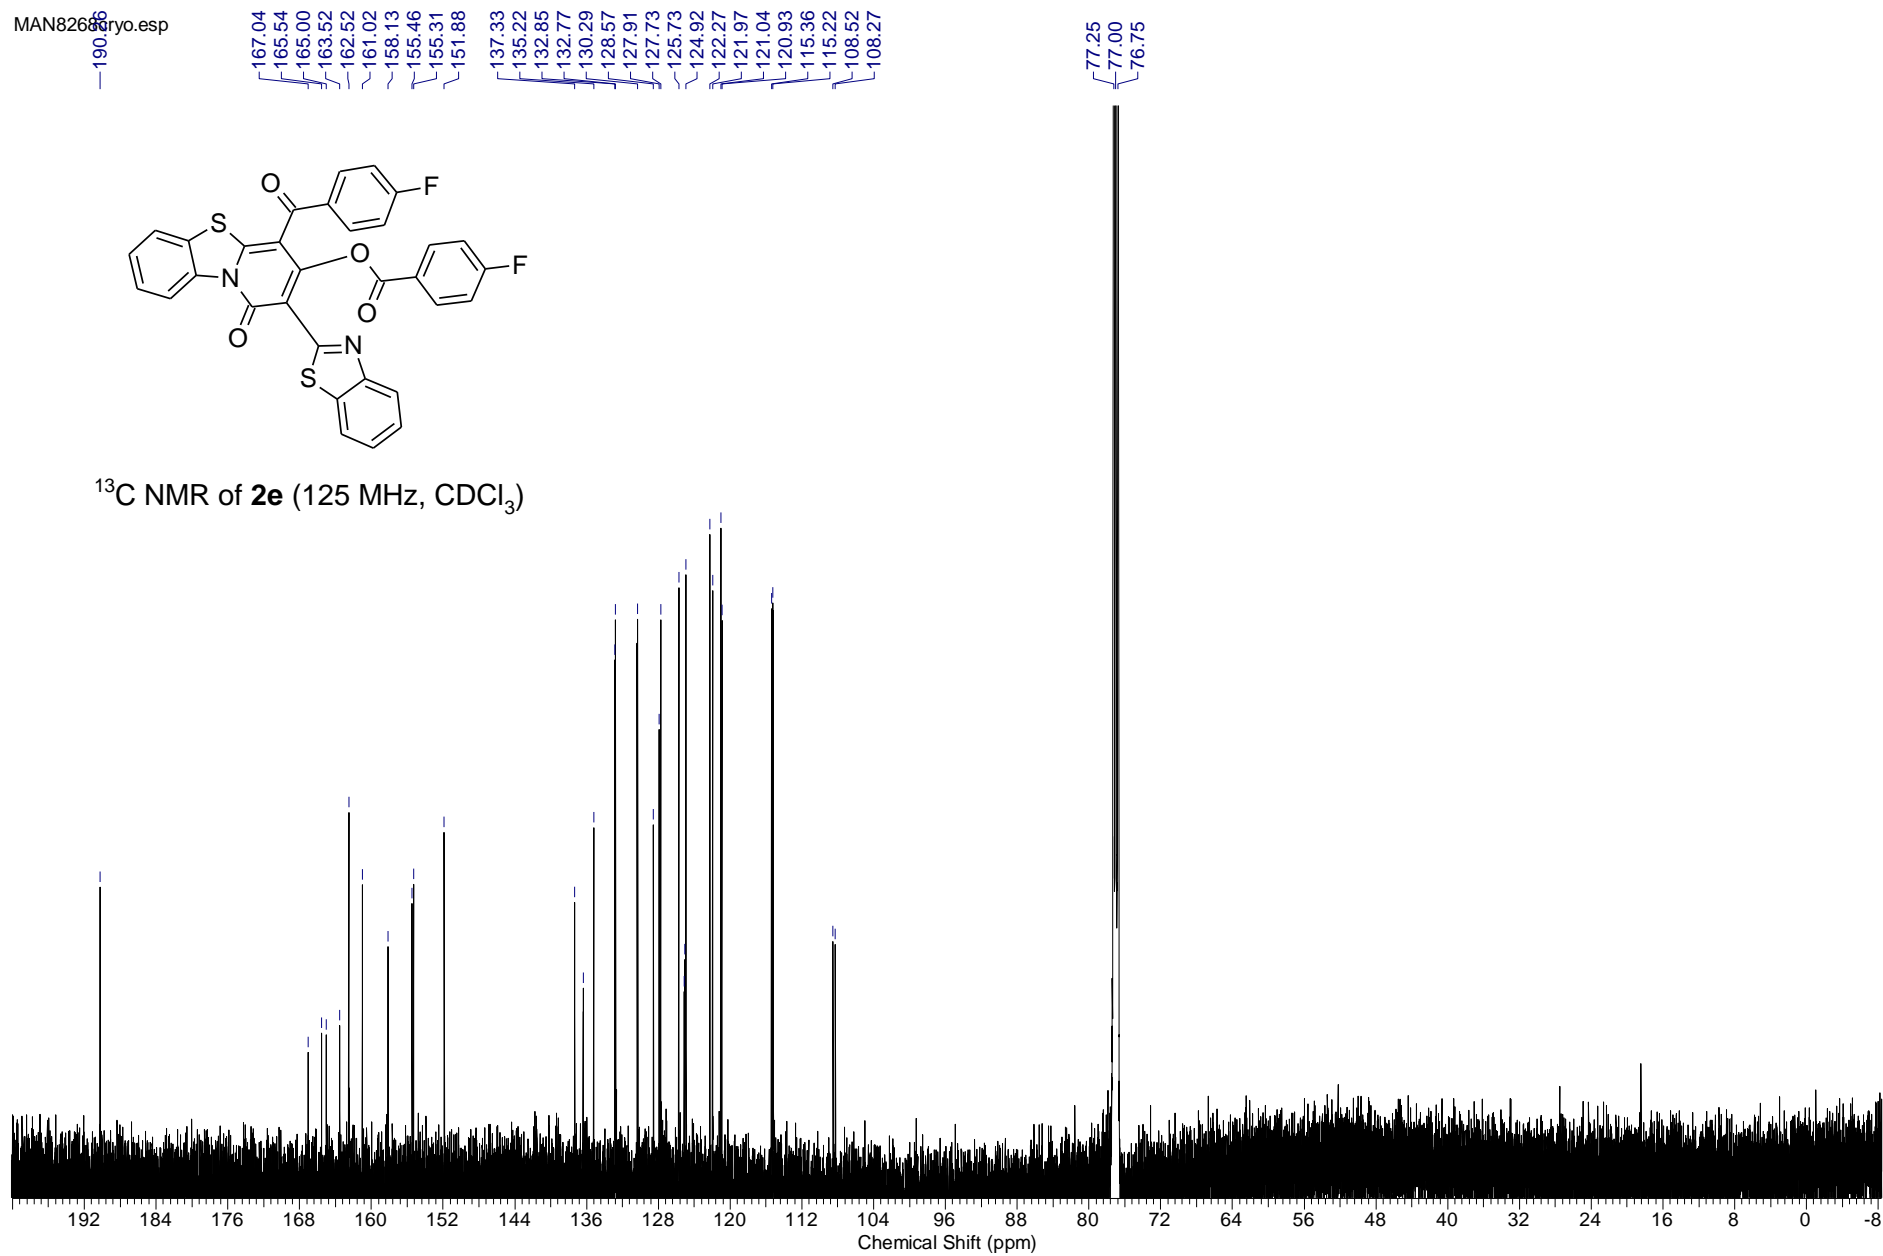

MAN8306.000

9.32  
9.30

8.24  
8.22  
8.22  
8.08  
8.01  
7.52  
7.51  
7.40  
7.39  
7.39  
7.38  
7.34  
7.33  
6.81  
6.80  
6.70  
6.69

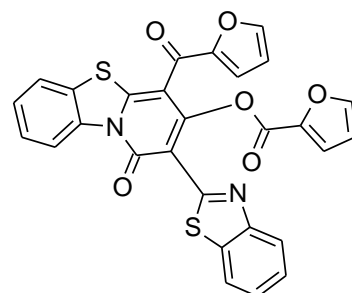

$^1\text{H}$  NMR of **2f** (400 MHz,  $\text{DMSO}-d_6$ )

3.26

2.51  
2.50  
2.50  
2.49

Due to the extremely low solubility of compounds **2**, in all  $^1\text{H}$  NMR spectra, grease and water signals seem to be very intense, but in fact, their content is very low.

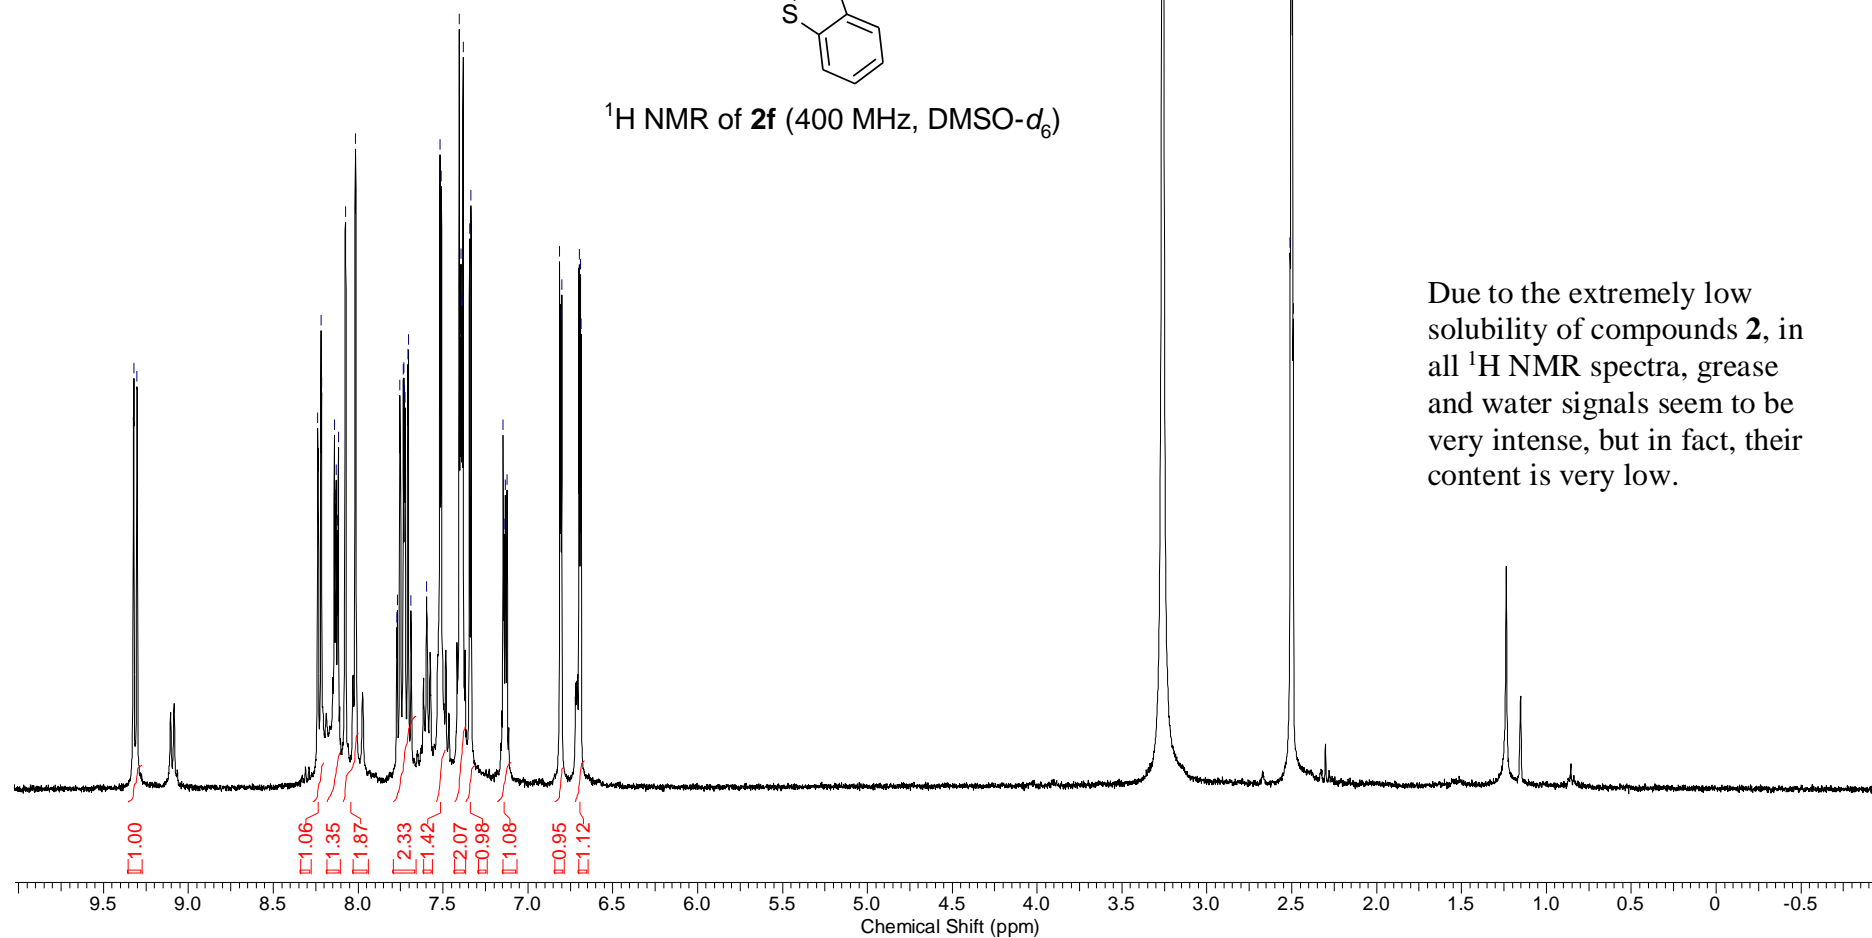

MAN8306cryo.esp

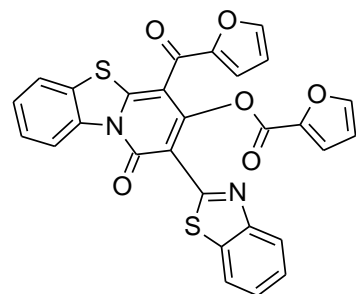

$^{13}\text{C}$  NMR of **2f** (125 MHz,  $\text{CDCl}_3$ )

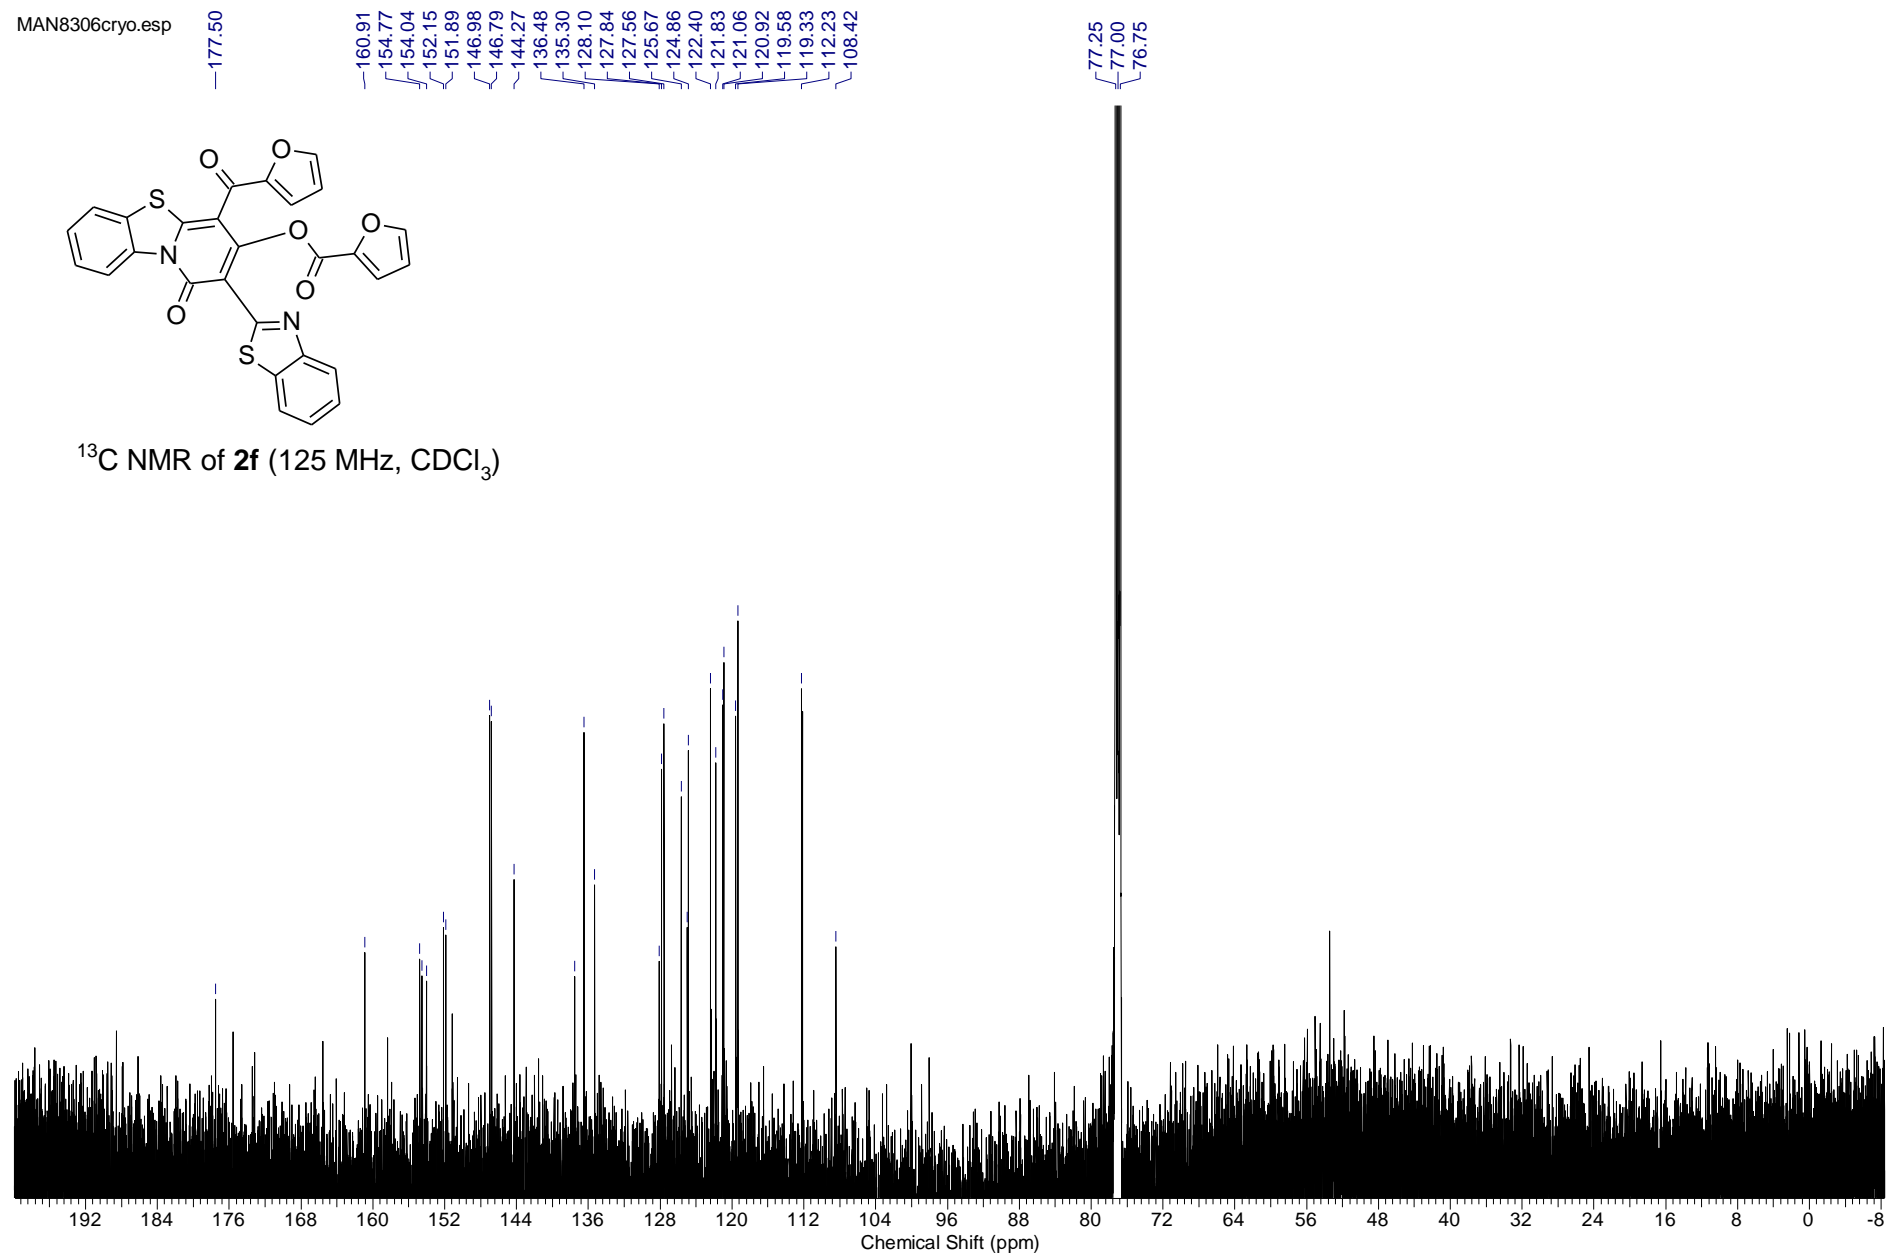

MAN8280.002.esp

8.21  
8.01  
8.00  
7.92  
7.76  
7.75  
7.74  
7.37  
7.25  
7.25  
7.21  
7.20  
7.19  
7.05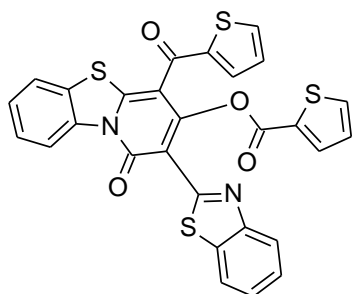 $^1\text{H}$  NMR of **2g** (400 MHz, DMSO- $d_6$ )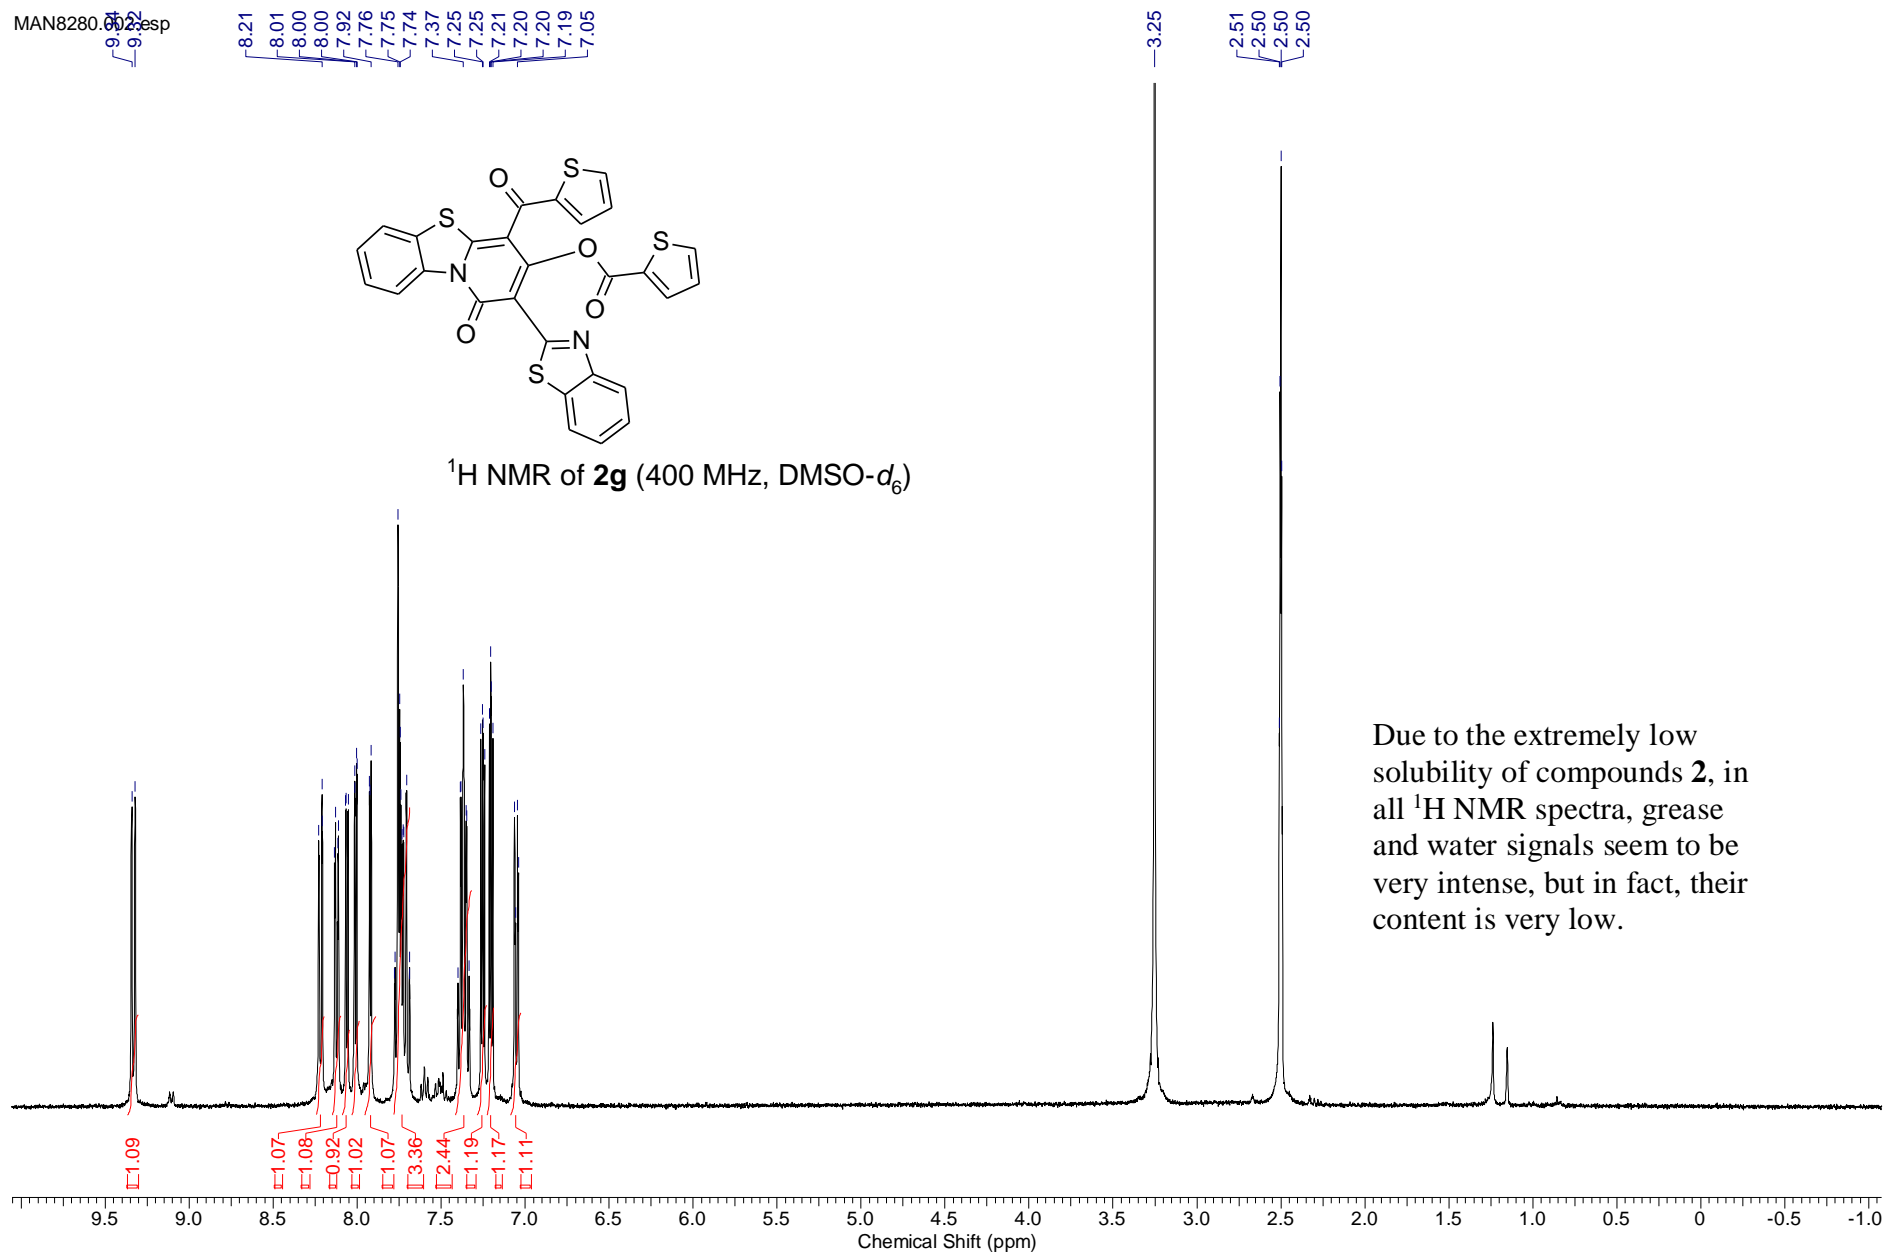

MAN8280cryo.es

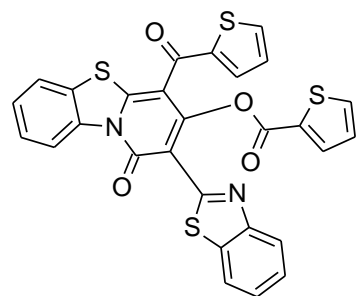

$^{13}\text{C}$  NMR of **2g** (125 MHz,  $\text{CDCl}_3$ )

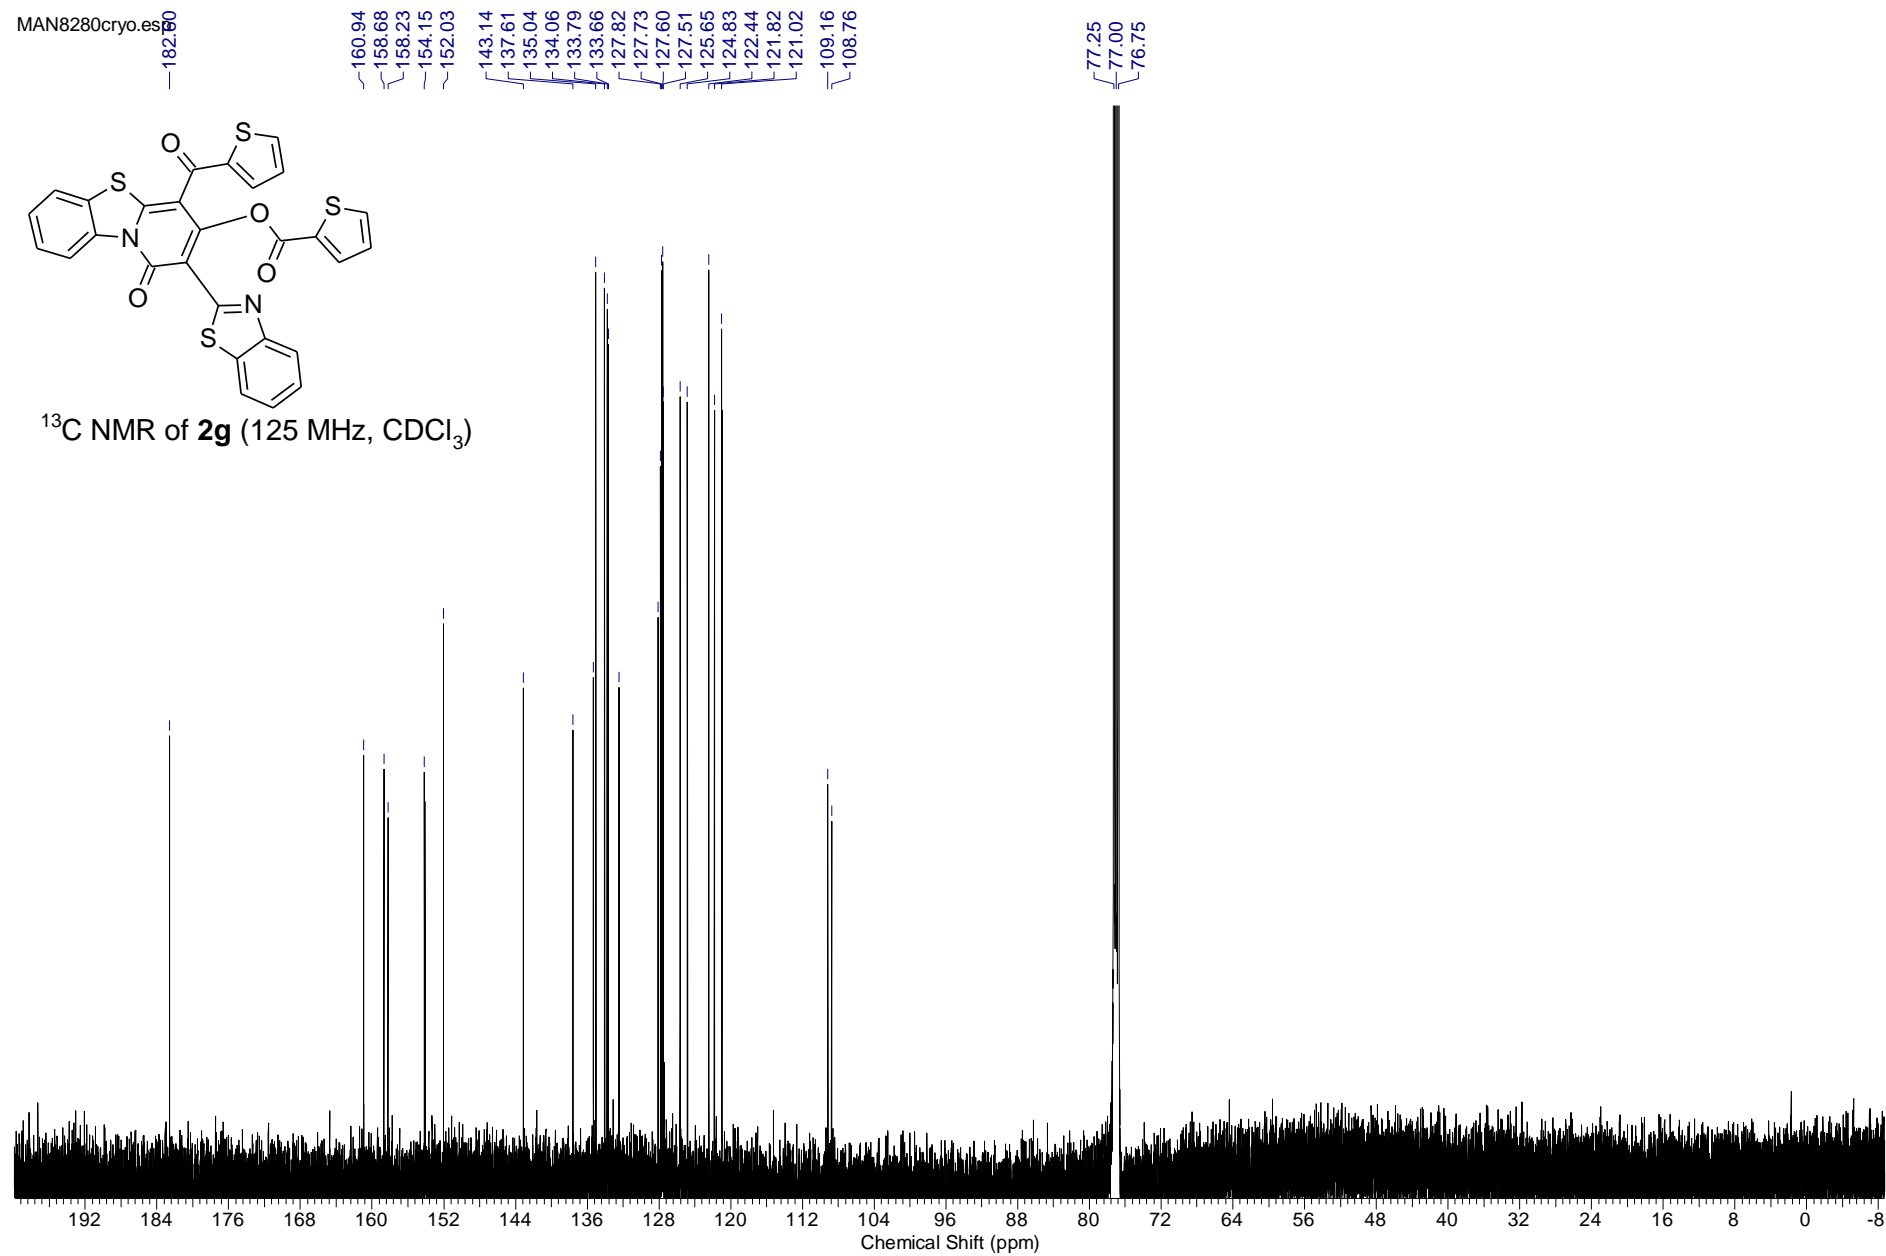

STA for compound **1a** is given in the main manuscript as Figure 2.

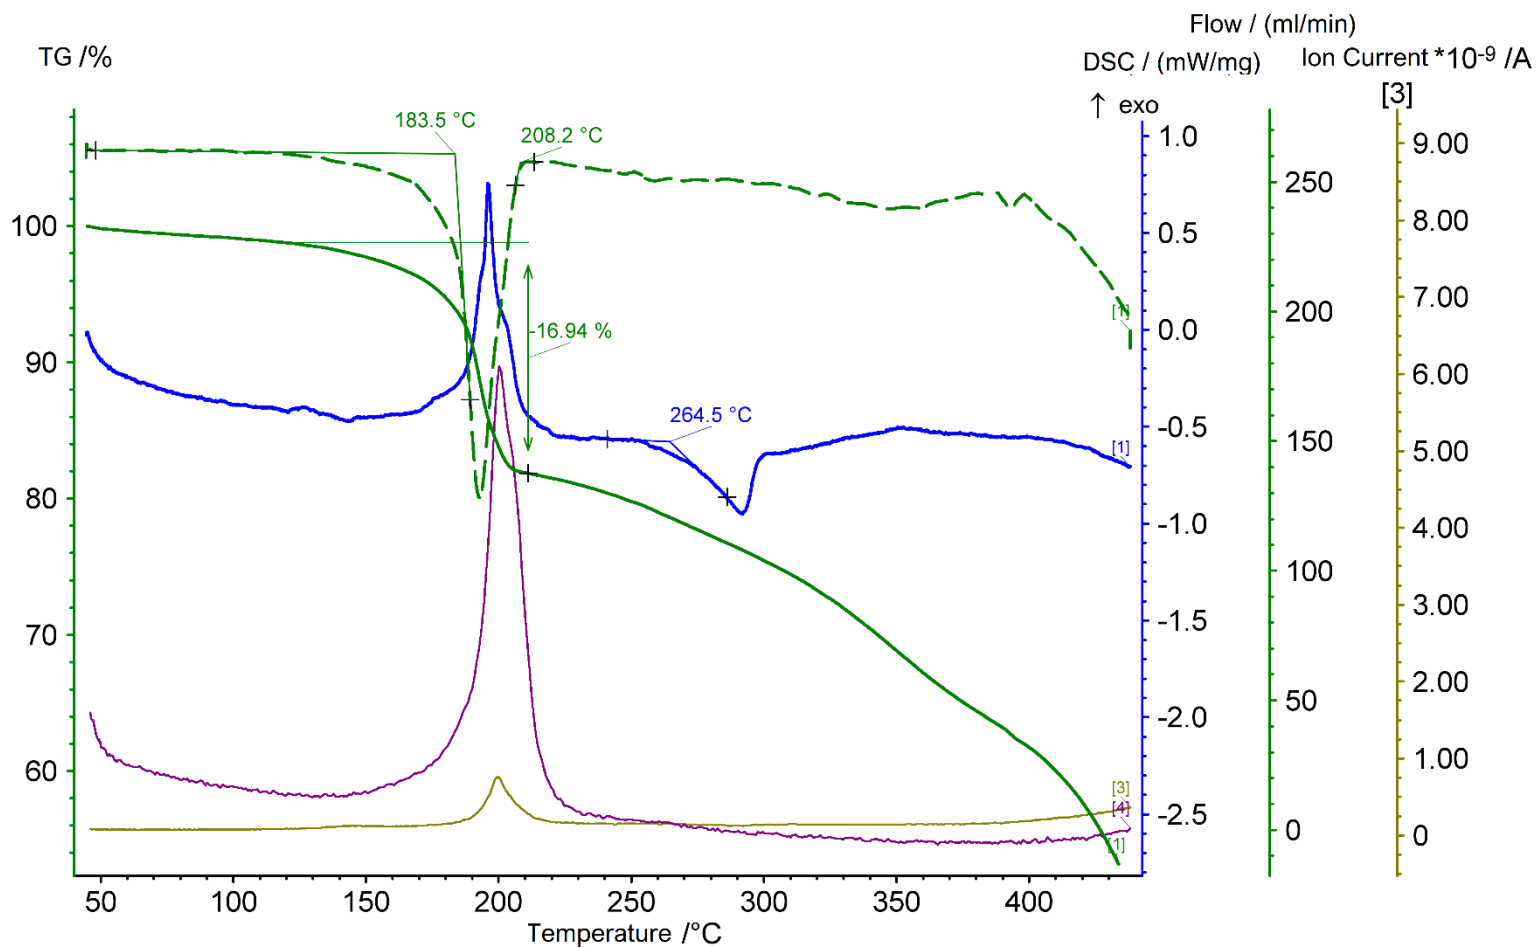

STA-MS plot of thermolysis of APBTT **1b**. Blue solid curve: differential scanning calorimetry (DSC); green solid curve: thermogravimetry (TG); green dashed curve: derivative thermogravimetry (dTG); violet solid curve:  $m/z = 28$  (MS); brown solid curve:  $m/z = 44$  (MS); heating rate: 10 K/min; argon atmosphere.

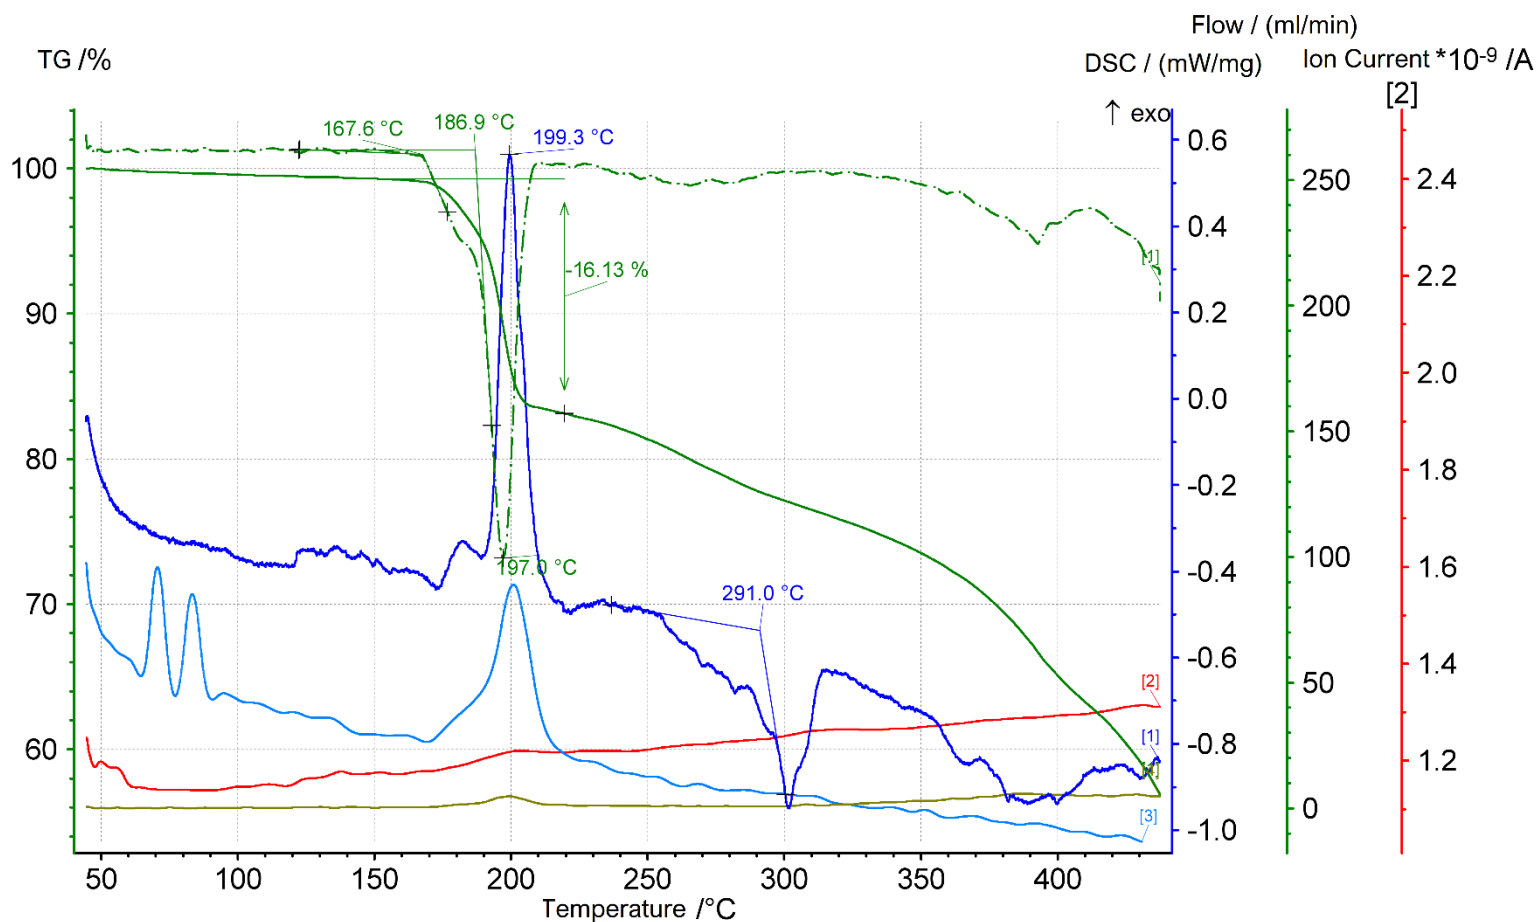

STA-MS plot of thermolysis of APBTT **1c**. Dark blue solid curve: differential scanning calorimetry (DSC); green solid curve: thermogravimetry (TG); green dashed curve: derivative thermogravimetry (dTG); light blue solid curve:  $m/z = 28$  (MS); brown solid curve:  $m/z = 44$  (MS); red solid curve:  $m/z = 18$  (MS); heating rate: 10 K/min; argon atmosphere.

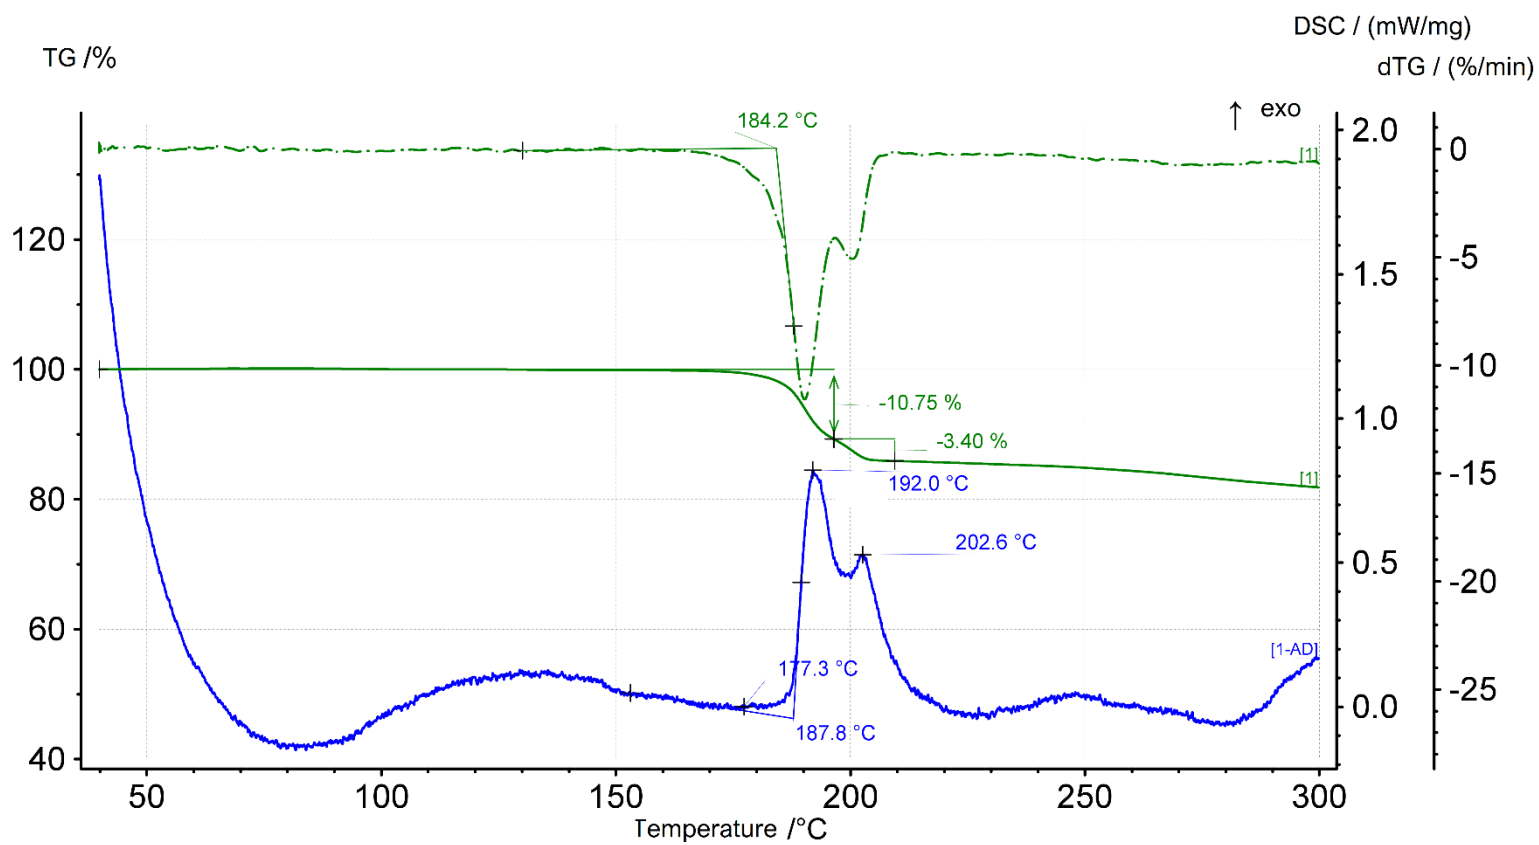

STA plot of thermolysis of APBTT **1d**. Blue solid curve: differential scanning calorimetry (DSC); green solid curve: thermogravimetry (TG); green dashed curve: derivative thermogravimetry (dTG); heating rate: 10 K/min; argon atmosphere.

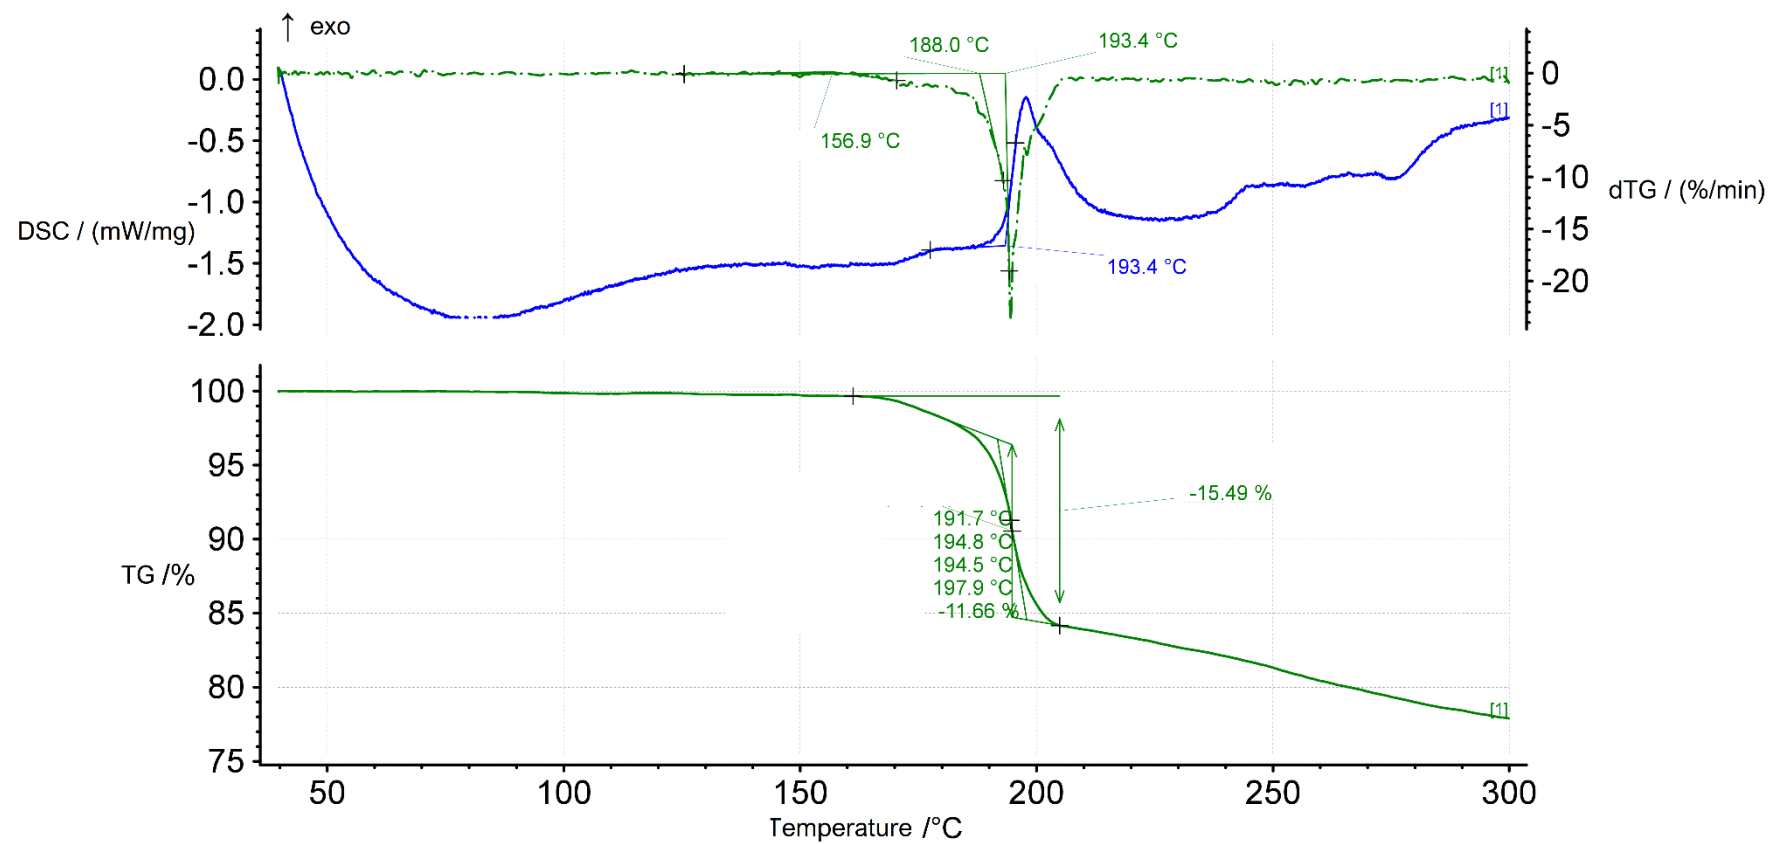

STA plot of thermolysis of APBTT **1e**. Blue solid curve: differential scanning calorimetry (DSC); green solid curve: thermogravimetry (TG); green dashed curve: derivative thermogravimetry (dTG); heating rate: 10 K/min; argon atmosphere.

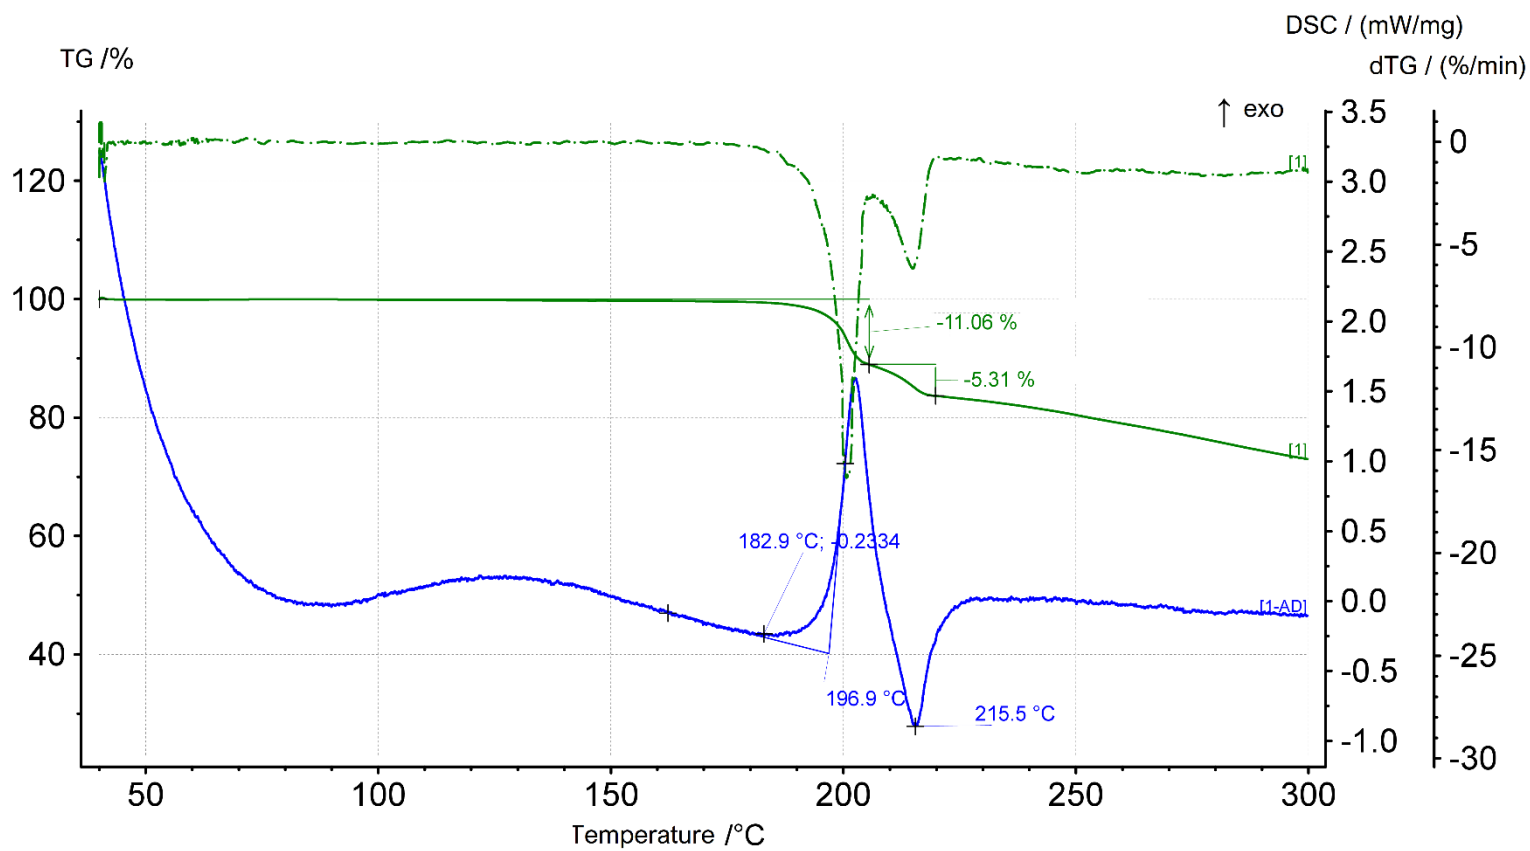

STA plot of thermolysis of APBTT **1f**. Blue solid curve: differential scanning calorimetry (DSC); green solid curve: thermogravimetry (TG); green dashed curve: derivative thermogravimetry (dTG); heating rate: 10 K/min; argon atmosphere.

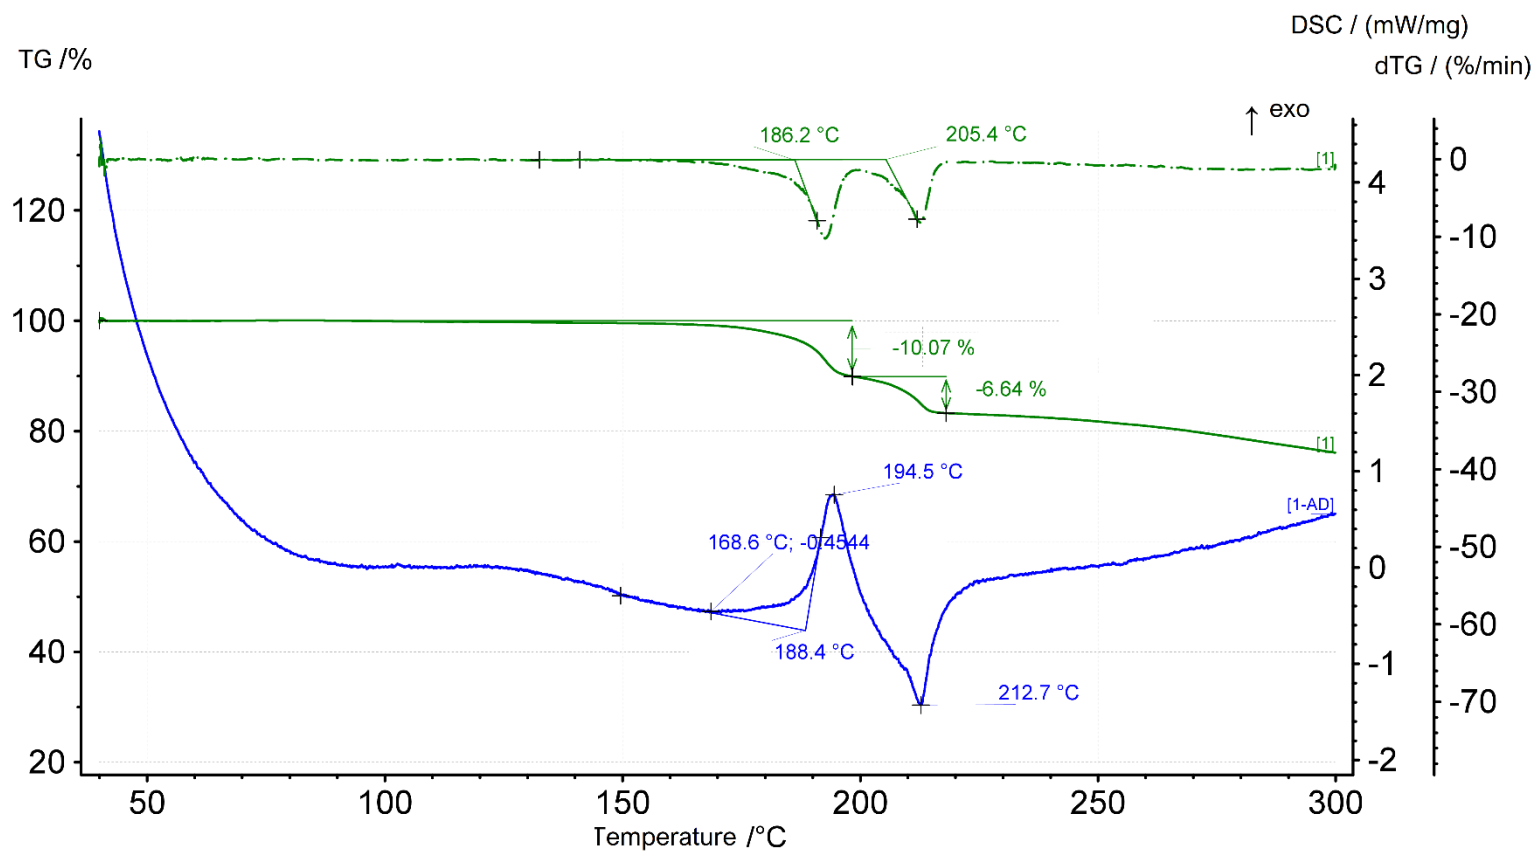

STA plot of thermolysis of APBTT **1g**. Blue solid curve: differential scanning calorimetry (DSC); green solid curve: thermogravimetry (TG); green dashed curve: derivative thermogravimetry (dTG); heating rate: 10 K/min; argon atmosphere.

STA for compound **4** is given in the main manuscript as Figure 3.

Calculated total electronic energies (E, in Hartree), enthalpies (H, in Hartree), Gibbs free energies (G, in Hartree), and entropies (S, cal/mol•K) for optimized equilibrium model structures.

| Model structure  | E              | H            | G            | S       |
|------------------|----------------|--------------|--------------|---------|
| <b>C≡O</b>       | -113.270735586 | -113.262253  | -113.284685  | 47.214  |
| <b>1a</b>        | -1444.70735195 | -1444.455575 | -1444.525734 | 147.663 |
| <b>2a</b>        | -2436.35209507 | -2435.892670 | -2435.989048 | 202.845 |
| <b>4</b>         | -1331.44520780 | -1331.204445 | -1331.267874 | 133.496 |
| <b>I1</b>        | -1331.40493977 | -1331.165836 | -1331.232877 | 141.101 |
| <b>3a</b>        | -1218.13873072 | -1217.911136 | -1217.972731 | 129.637 |
| <b>I2</b>        | -2436.34498787 | -2435.885574 | -2435.981547 | 201.991 |
| <b>I3</b>        | -2662.86833777 | -2662.386369 | -2662.491404 | 221.064 |
| <b>I4</b>        | -2662.88828775 | -2662.405061 | -2662.511852 | 224.762 |
| TS <b>1ato4</b>  | -1444.67329159 | -1444.422782 | -1444.487602 | 136.427 |
| TS <b>1atoI1</b> | -1444.65245589 | -1444.404343 | -1444.475055 | 148.825 |
| TS <b>4to3a</b>  | -1331.39047748 | -1331.153768 | -1331.219893 | 139.174 |
| TS <b>I1to3a</b> | -1331.29957001 | -1331.064020 | -1331.135054 | 149.503 |

## HPLC data for thermal decomposition of compounds **1a** and **4**

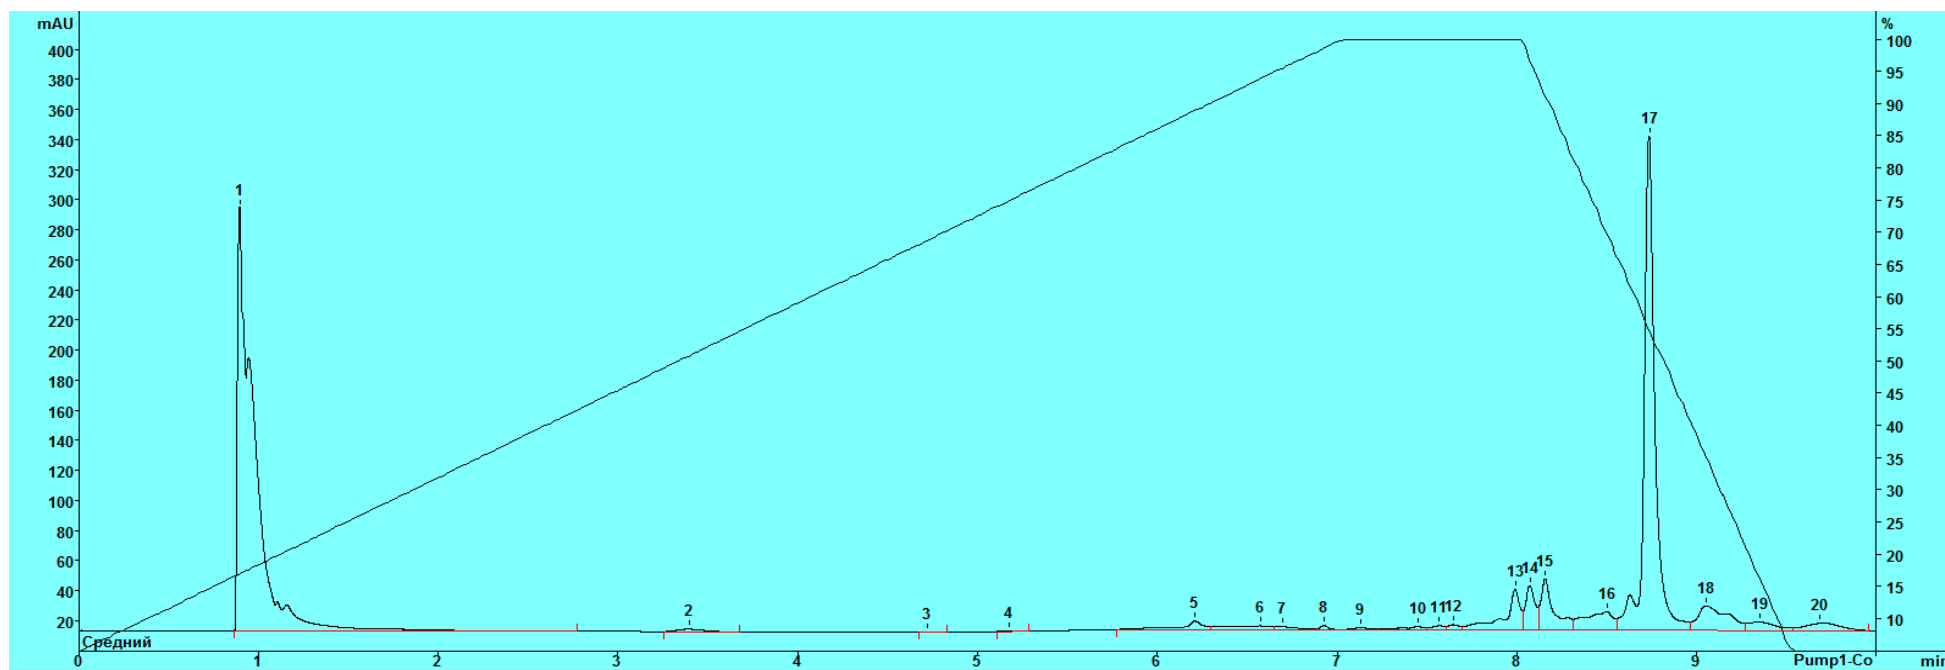

HPLC-UV chromatogram of compound **1a** after measuring of m.p. in a capillary. Peak 17 corresponds to product **2a**. UV signal is given as an average value ( $\lambda$  210–750 nm).

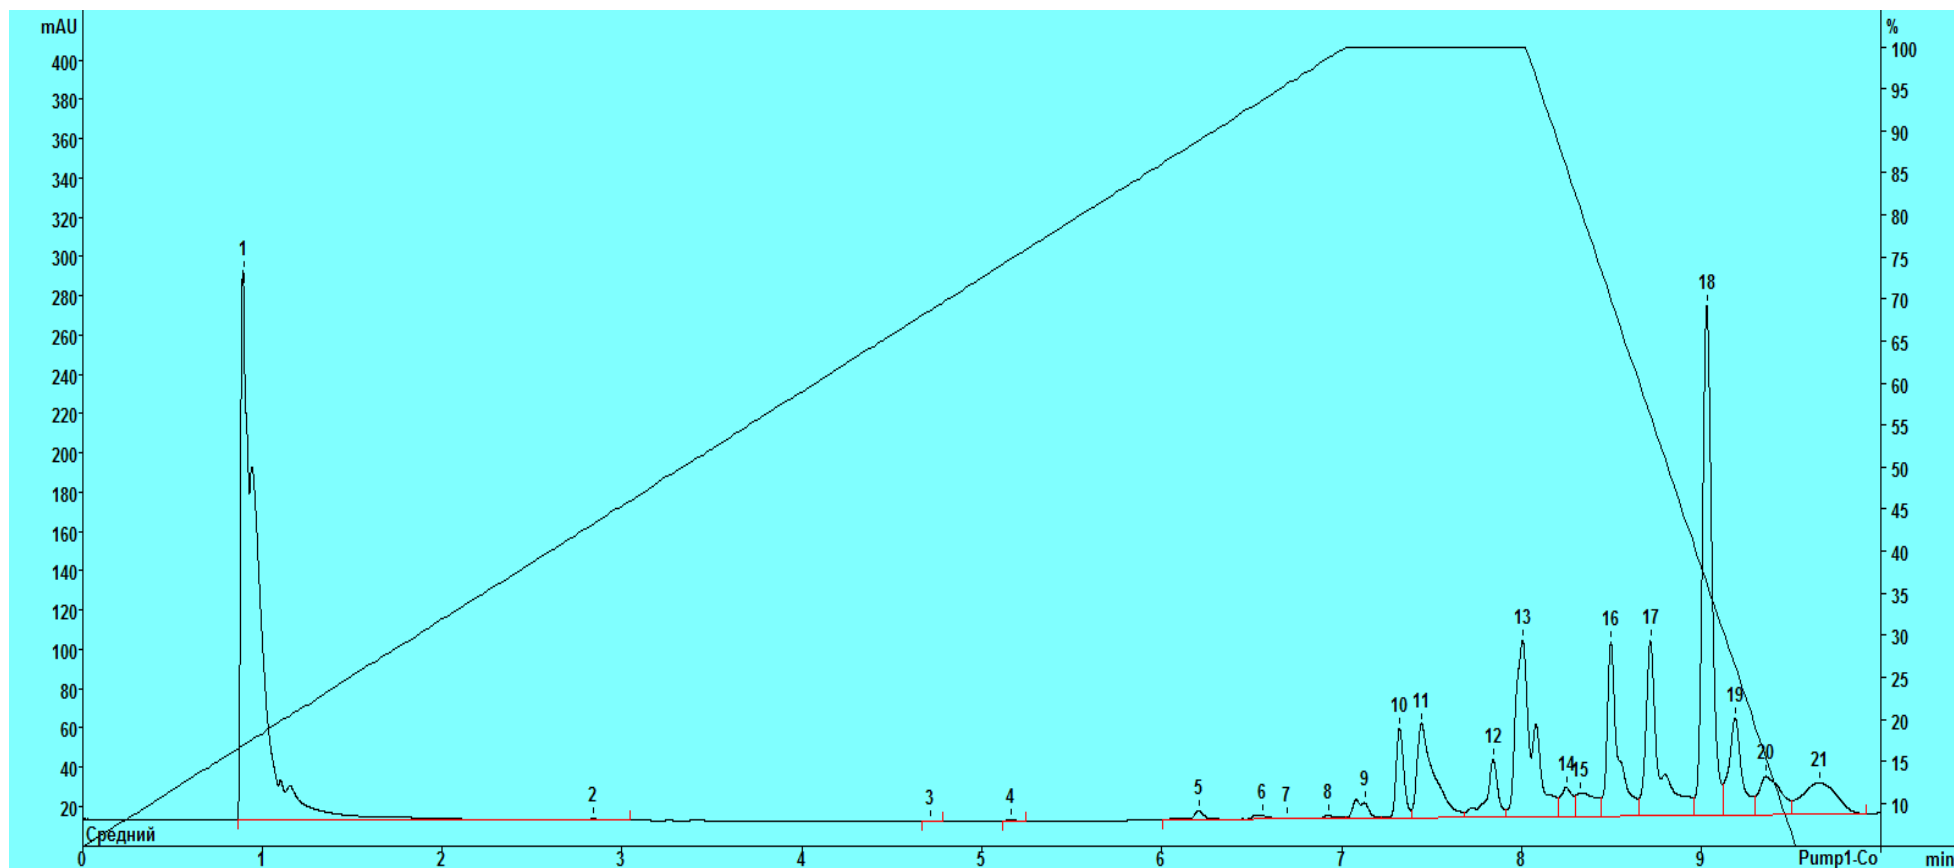

HPLC-UV chromatogram of compound **4** after measuring of m.p. in a capillary. Peak 17 corresponds to product **2a**. UV signal is given as an average value ( $\lambda$  210–750 nm).

Gradient elution time program:

| # | Time, hh : mm : ss | Flow, mL/min | Conc. A, % | Conc. B, % |
|---|--------------------|--------------|------------|------------|
| 0 | 00 : 00 : 00       | 1.5          | 95         | 5          |
| 1 | 00 : 07 : 00       | 1.5          | 0          | 100        |
| 2 | 00 : 08 : 00       | 1.5          | 0          | 100        |
| 3 | 00 : 09 : 30       | 1.5          | 95         | 5          |
| 4 | 00 : 10 : 00       | 1.5          | 95         | 5          |

A – water, B – acetonitrile.

ORTEP images of X-ray crystal structures of compounds **2a, f**

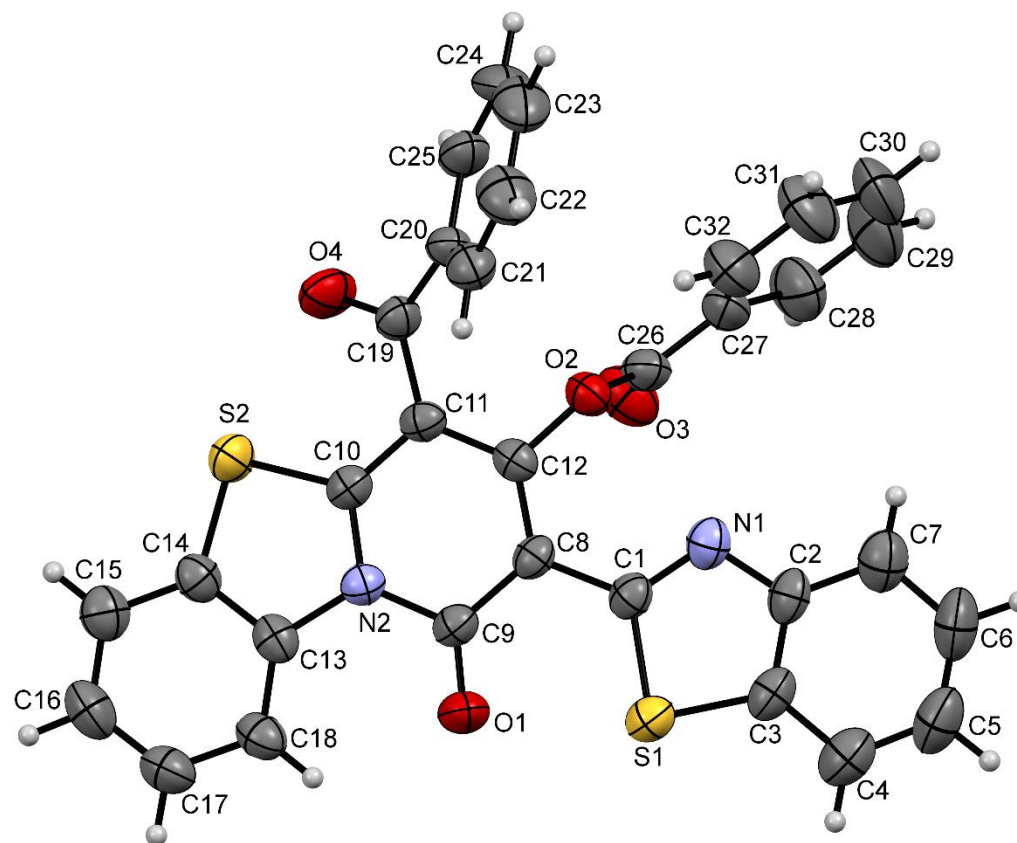

*Molecular structure of compound **2a** showing 30% probability amplitude displacement ellipsoids (CCDC 2277018).*

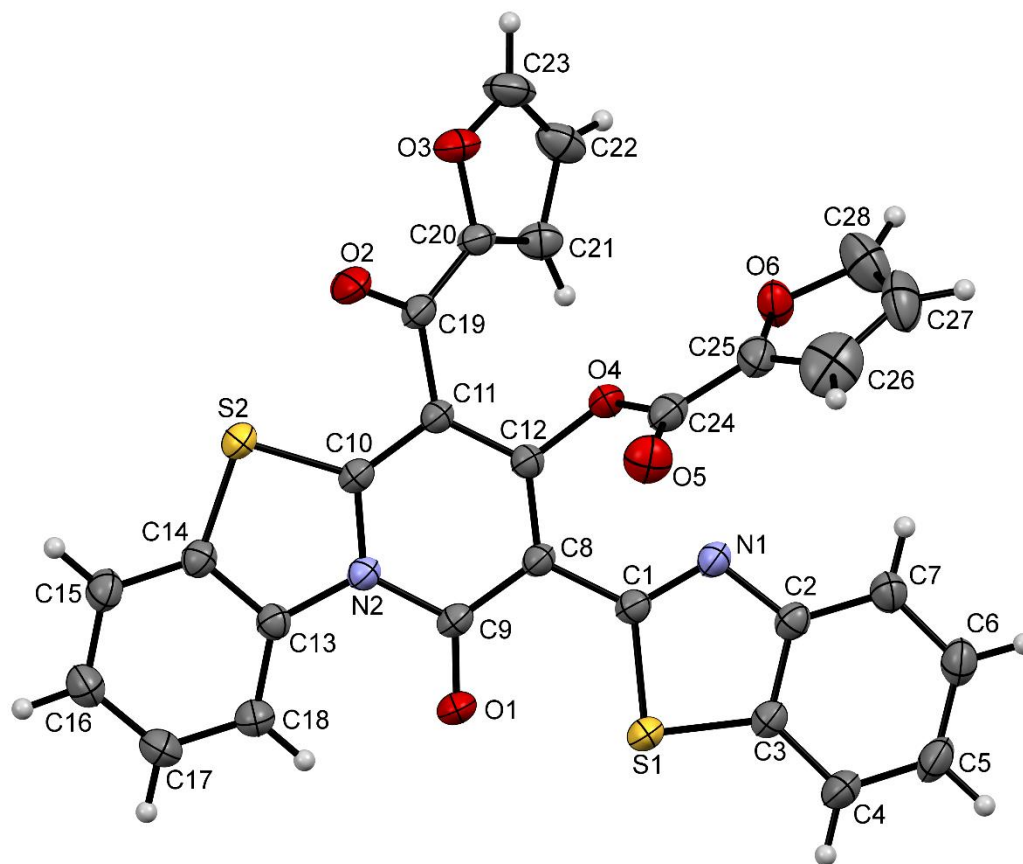

*Molecular structure of compound 2f showing 30% probability amplitude displacement ellipsoids (CCDC 2277017).*
